# Supplementary material for: Overcoming IGF1R-Mediated Resistance to Oncolytic HSV1 and Radiotherapy via Triple Combination Therapy
Source: Research Square preprint supplement (doi:10.21203/rs.3.rs-8117591/v1), 2025-12-15
Supplement: Supplementary file 2 [file b251c1544692ee15df031ef2.xlsx]

## Sheet: Figure 1A
	Figure 1A
	Unpaired Student's T-Test with Welch Correction and Two-stage step-up (Benjamini, Krieger, and Yekutieli) False Discovery Test (Desired FDR (Q) = 1%)
	GBM39
	MOI	Discovery?	P value	0 MOI (n=4)	Mean of MOI Treatment (n=4)	Difference	SE of difference	t ratio	df	q value
	0.0162	Yes	0.000184	100	136.8	-36.77	4.515	8.145	6	0.000186
	0.012	Yes	0.001868	100	125	-24.96	4.729	5.278	6	0.001887
	0.05	Yes	0.003078	100	79.03	20.97	4.39	4.775	6	0.003109
	0.1	Yes	1.3e-05	100	48.53	51.47	2.809	18.32	4.799	1.3e-05
	0.2	Yes	<0.000001	100	26.73	73.27	2.237	32.76	5.743	<0.000001
	GBM6
	MOI	Discovery?	P value	0 MOI (n=4)	Mean of MOI Treatment (n=4)	Difference	SE of difference	t ratio	df	q value
	0.006	Yes	0.003934	98.29	124.8	-26.51	4.434	5.979	4	0.003973
	0.01	No	0.418866	98.29	103.5	-5.203	5.78	0.9003	4	0.423055
	0.02	No	0.050217	98.29	92.46	5.826	2.102	2.772	4	0.050719
	0.05	Yes	0.000374	98.29	54.26	44.03	1.591	27.67	2.48	0.000378
	GBM28
	MOI	Discovery?	P value	0 MOI (n=4)	Mean of MOI Treatment (n=4)	Difference	SE of difference	t ratio	df	q value
	0.025	Yes	0.000867	98.31	121.1	-22.81	3.726	6.122	6	0.000876
	0.05	No	0.17902	98.31	90.53	7.787	5.119	1.521	6	0.18081
	0.1	Yes	0.000354	98.31	65.24	33.08	4.502	7.347	5.891	0.000357
	0.2	Yes	0.000114	98.31	56.59	41.72	4.69	8.895	5.987	0.000115
	0.4	Yes	7.9e-05	98.31	47.8	50.52	3.858	13.1	4.618	8e-05
	GBM22
	MOI	Discovery?	P value	0 MOI (n=4)	Mean of MOI Treatment (n=4)	Difference	SE of difference	t ratio	df	q value
	0.01	Yes	0.001241	100.8	130.8	-29.94	3.68	8.136	4	0.001254
	GBM39 Exp 2 (single very low dose)
	MOI	Discovery?	P value	0 MOI (n=4)	Mean of MOI Treatment (n=4)	Difference	SE of difference	t ratio	df	q value
	0.0025	Yes	3.3e-05	101	141	-39.93	1.945	20.53	4	3.4e-05

## Sheet: Figure 1B
	Figure 1B
	Unpaired Student's T-Test with Welch Correction and Two-stage step-up (Benjamini, Krieger, and Yekutieli) False Discovery Test (Desired FDR (Q) = 1%)
	U251T3
		Discovery?	P value	Mean NT (n=3)	Mean oHSV (n=3)	Difference	SE of difference	t ratio	df	q value
	All ki67+	Yes	0.001623	4.62	15.61	-10.99	1.449	7.582	4	0.001639
	GBM12
		Discovery?	P value	Mean NT (n=3)	Mean oHSV (n=3)	Difference	SE of difference	t ratio	df	q value
	All ki67+	Yes	0.021716	22.41	27.6	-5.187	1.42	3.653	4	0.022802

## Sheet: Figure 3A
	Figure 3A
	Unpaired Student's T-Test with Welch Correction and Two-stage step-up (Benjamini, Krieger, and Yekutieli) False Discovery Test (Desired FDR (Q) = 1%)
	NT vs. oHSV
	Cell	Discovery?	P value	Mean of NT (n=7)	Mean of oHSV+OSI-906 (n=4)	Difference	SE of difference	t ratio	df	q value
	GBM6	No	0.534966	0	-3.491	3.491	5.243	0.6659	5	0.540316
	MDA468	Yes	0.002511	0	31.95	-31.95	4.733	6.75	4	0.002536
	MDA231	Yes	0.000598	0	19.49	-19.49	2.969	6.565	6	0.000604
	GBM12	No	0.039403	0	7.541	-7.541	2.502	3.014	4	0.039797
	GBM28	Yes	0.002767	0	15.76	-15.76	3.229	4.88	6	0.002795
	GBM59	Yes	2.5e-05	0	29.27	-29.27	1.322	22.15	4	2.5e-05
	NT vs. OSI-906
	Days	Discovery?	P value	Mean of NT (n=4)	Mean of OSI-906 (n=4)	Difference	SE of difference	t ratio	df	q value
	GBM6	Yes	0.000791	0	-20.38	20.38	3.271	6.23	6	0.000799
	MDA468	Yes	7e-06	0	46.43	-46.43	3.212	14.45	6	7e-06
	MDA231	Yes	4e-06	0	23.55	-23.55	1.481	15.91	6	4e-06
	GBM12	No	0.012664	0	6.827	-6.827	1.588	4.298	4	0.012791
	GBM28	Yes	0.005395	0	10.47	-10.47	2.465	4.247	6	0.005449
	GBM59	Yes	6.2e-05	0	29.49	-29.49	1.681	17.54	4	6.3e-05
	NT vs. oHSV + OSI-906
	Days	Discovery?	P value	Mean of NT (n=4)	Mean of oHSV (n=4)	Difference	SE of difference	t ratio	df	q value
	GBM6	Yes	0.007487	0	21.95	-21.95	5.548	3.956	6	0.007562
	MDA468	Yes	2e-06	0	58.47	-58.47	3.186	18.35	6	2e-06
	MDA231	Yes	<0.000001	0	41.05	-41.05	1.42	28.9	6	<0.000001
	GBM12	Yes	0.000415	0	16.11	-16.11	1.49	10.81	4	0.000419
	GBM28	Yes	3e-05	0	27.27	-27.27	2.43	11.22	6	3e-05
	GBM59	Yes	1e-05	0	44.94	-44.94	1.631	27.55	4	1e-05
	OSI-906 vs. oHSV+OSI-906
	Days	Discovery?	P value	Mean of OSI-906 (n=4)	Mean of oHSV+OSI-906 (n=4)	Difference	SE of difference	t ratio	df	q value
	GBM6	Yes	0.00033	-20.38	21.95	-42.33	5.776	7.328	6	0.000333
	MDA468	Yes	4.5e-05	46.43	58.47	-12.04	1.154	10.43	6	4.6e-05
	MDA231	Yes	4e-06	23.55	41.05	-17.5	1.099	15.92	6	4e-06
	GBM12	Yes	0.000648	6.827	16.11	-9.282	0.963	9.638	4	0.000655
	GBM28	Yes	2e-06	10.47	27.27	-16.79	0.972	17.28	6	2e-06
	GBM59	Yes	0.000597	29.49	44.94	-15.45	1.569	9.846	4	0.000603
	oHSV vs. oHSV+OSI-906
	Days	Discovery?	P value	Mean of oHSV (n=4)	Mean of oHSV+OSI-906 (n=4)	Difference	SE of difference	t ratio	df	q value
	GBM6	No	0.021338	-3.491	21.95	-25.44	7.695	3.306	5	0.021551
	MDA468	Yes	5.7e-05	31.95	58.47	-26.51	1.48	17.92	4	5.8e-05
	MDA231	Yes	0.000251	19.49	41.05	-21.56	2.799	7.703	6	0.000253
	GBM12	No	0.016587	7.541	16.11	-8.568	2.16	3.966	4	0.016753
	GBM28	Yes	0.002449	15.76	27.27	-11.51	2.301	5.001	6	0.002473
	GBM59	Yes	0.000183	29.27	44.94	-15.67	1.176	13.33	4	0.000185
	OSI-906 vs. oHSV
	Days	Discovery?	P value	Mean of OSI-906 (n=4)	Mean of oHSV (n=4)	Difference	SE of difference	t ratio	df	q value
	GBM6	No	0.029134	-20.38	-3.491	-16.89	5.577	3.028	5	0.029426
	MDA468	Yes	0.000828	46.43	31.95	14.48	1.601	9.044	4	0.000836
	MDA231	No	0.20151	23.55	19.49	4.059	2.83	1.434	6	0.203525
	GBM12	No	0.764806	6.827	7.541	-0.714	2.229	0.3203	4	0.772454
	GBM28	No	0.064474	10.47	15.76	-5.286	2.338	2.261	6	0.065119
	GBM59	No	0.869653	29.49	29.27	0.2176	1.244	0.1749	4	0.87835

## Sheet: Figure 3B
	Figure 3B
	Unpaired Student's T-Test with Welch Correction and Two-stage step-up (Benjamini, Krieger, and Yekutieli) False Discovery Test (Desired FDR (Q) = 1%)
	NT vs. oHSV
	Cell	Discovery?	P value	Mean of NT (n=7)	Mean of oHSV (n=4)	Difference	SE of difference	t ratio	df	q value
	GBM6	Yes	0.005712	1	1.342	-0.3419	0.0288	11.87	2.114	0.005769
	MDA468	Yes	0.000421	1	6.517	-5.517	0.1323	41.7	2.102	0.000425
	NT vs. OSI-906
	Days	Discovery?	P value	Mean of NT (n=4)	Mean of OSI-906 (n=4)	Difference	SE of difference	t ratio	df	q value
	GBM6	Yes	0.000949	1	1.522	-0.5224	0.03052	17.12	2.606	0.000959
	MDA468	No	0.045754	1	1.084	-0.08446	0.02949	2.864	4	0.046212
	NT vs. oHSV + OSI-906
	Days	Discovery?	P value	Mean of NT (n=4)	Mean of oHSV + OSI-906 (n=4)	Difference	SE of difference	t ratio	df	q value
	GBM6	Yes	0.00026	1	2.254	-1.254	0.02924	42.89	2.24	0.000263
	MDA468	Yes	0.000224	1	8.624	-7.624	0.1348	56.57	2.098	0.000227
	OSI-906 vs. oHSV+OSI-906
	Days	Discovery?	P value	Mean of OSI-906 (n=4)	Mean of oHSV+OSI-906 (n=4)	Difference	SE of difference	t ratio	df	q value
	GBM6	Yes	4e-06	1.522	2.254	-0.7316	0.01317	55.54	3.348	4e-06
	MDA468	Yes	0.00023	1.084	8.624	-7.539	0.1348	55.95	2.098	0.000232
	oHSV vs. oHSV+OSI-906
	Days	Discovery?	P value	Mean of oHSV (n=4)	Mean of oHSV+OSI-906 (n=4)	Difference	SE of difference	t ratio	df	q value
	GBM6	Yes	<0.000001	1.342	2.254	-0.9121	0.008453	107.9	3.548	<0.000001
	MDA468	Yes	0.000351	6.517	8.624	-2.106	0.1865	11.29	3.999	0.000355
	OSI-906 vs. oHSV
	Days	Discovery?	P value	Mean of OSI-906 (n=4)	Mean of oHSV (n=4)	Difference	SE of difference	t ratio	df	q value
	GBM6	Yes	0.001128	1.342	1.522	-0.1805	0.01217	14.84	2.711	0.001139
	MDA468	Yes	0.000435	6.517	1.084	5.433	0.1323	41.06	2.102	0.000439

## Sheet: Figure 3D
	4T1 Mammary Fatpad
	Unpaired Student's T-Test with Welch Correction and Two-stage step-up (Benjamini, Krieger, and Yekutieli) False Discovery Test (Desired FDR (Q) = 1%)											Two-way ANOVA
	PBS vs. oHSV+OSI-906											PBS (n = 7) - oHSV+OSI-906 (n=8)
	Days	Discovery?	P value	Mean of PBS (n=7)	Mean of oHSV+OSI (n=8)	Difference	SE of difference	t ratio	df	q value		Source of Variation	% of total variation	P value	P value summary	Significant?	Geisser-Greenhouse's epsilon	Šídák's multiple comparisons test	Mean Diff.	95.00% CI of diff.	Below threshold?	Summary	Adjusted P Value	Mean 1	Mean 2	Mean Diff.	SE of diff.	N1	N2	t	DF
	0	Yes	0.02987	179.3	127.4	51.9	20.48	2.534	9.903	0.006704		Time x Treatment	12.26	<0.0001	****	Yes		0	51.9	-20.06 to 123.9	No	ns	0.2389	179.3	127.4	51.9	20.48	7	8	2.534	9.903
	2	Yes	0.010338	249.8	168.7	81.08	27.07	2.995	12.99	0.00261		Time	55.82	<0.0001	****	Yes	0.1866	2	81.08	-8.418 to 170.6	No	ns	0.0893	249.8	168.7	81.08	27.07	7	8	2.995	12.99
	4	Yes	0.006979	277.6	151.6	126	34.44	3.658	7.62	0.002014		Treatment	21.89	<0.0001	****	Yes		4	126	-5.092 to 257.1	No	ns	0.0611	277.6	151.6	126	34.44	7	8	3.658	7.62
	6	Yes	0.000625	345.7	124.9	220.8	44.74	4.936	9.813	0.00021		Subject	6.875	<0.0001	****	Yes		6	220.8	63.26 to 378.4	Yes	**	0.0056	345.7	124.9	220.8	44.74	7	8	4.936	9.813
	8	Yes	0.000185	459.8	156.5	303.4	53.29	5.692	10.21	0.000132		ANOVA table	SS	DF	MS	F (DFn, DFd)	P value	8	303.4	117.6 to 489.2	Yes	**	0.0017	459.8	156.5	303.4	53.29	7	8	5.692	10.21
	10	Yes	0.000345	684.7	257.8	426.9	78.56	5.434	9.491	0.000174		Time x Treatment	2573475	8	321684	F (8, 104) = 25.20	P<0.0001	10	426.9	147.7 to 706.0	Yes	**	0.0031	684.7	257.8	426.9	78.56	7	8	5.434	9.491
	12	Yes	2.4e-05	892.2	370	522.2	79.09	6.603	12.16	4.8e-05		Time	11720803	8	1465100	F (1.493, 19.41) = 114.8	P<0.0001	12	522.2	257.2 to 787.2	Yes	***	0.0002	892.2	370	522.2	79.09	7	8	6.603	12.16
	14	Yes	0.000195	1157	471	685.8	114.2	6.007	9.061	0.000132		Treatment	4596342	1	4596342	F (1, 13) = 41.39	P<0.0001	14	685.8	274.8 to 1097	Yes	**	0.0018	1157	471	685.8	114.2	7	8	6.007	9.061
	16	Yes	0.000551	1498	587.7	910.6	169.6	5.369	8.48	0.00021		Subject	1443582	13	111045	F (13, 104) = 8.700	P<0.0001	16	910.6	287.7 to 1534	Yes	**	0.005	1498	587.7	910.6	169.6	7	8	5.369	8.48
												Residual	1327493	104	12764
	PBS vs. OSI-906											PBS (n=7) - OSI-906 (n=7)
	Days	Discovery?	P value	Mean of PBS (n=7)	Mean of OSI-906 (n=7)	Difference	SE of difference	t ratio	df	q value		Source of Variation	% of total variation	P value	P value summary	Significant?	Geisser-Greenhouse's epsilon	Šídák's multiple comparisons test	Mean Diff.	95.00% CI of diff.	Below threshold?	Summary	Adjusted P Value	Mean 1	Mean 2	Mean Diff.	SE of diff.	N1	N2	t	DF
	0	No	0.486475	179.3	162.9	16.41	22.83	0.7189	11.58	0.491339		Time x Treatment	5.769	<0.0001	****	Yes		0	16.41	-60.87 to 93.69	No	ns	0.9975	179.3	162.9	16.41	22.83	7	7	0.7189	11.58
	2	No	0.067884	249.8	197.7	52.13	25.98	2.007	12	0.077134		Time	73.3	<0.0001	****	Yes	0.2116	2	52.13	-35.15 to 139.4	No	ns	0.4688	249.8	197.7	52.13	25.98	7	7	2.007	12
	4	No	0.047661	277.6	195.7	81.88	35.12	2.332	8.098	0.072206		Treatment	8.478	0.0017	**	Yes		4	81.88	-49.02 to 212.8	No	ns	0.3556	277.6	195.7	81.88	35.12	7	7	2.332	8.098
	6	No	0.067854	345.7	249	96.7	47.73	2.026	10.95	0.077134		Subject	6.273	<0.0001	****	Yes		6	96.7	-66.92 to 260.3	No	ns	0.4687	345.7	249	96.7	47.73	7	7	2.026	10.95
	8	No	0.012027	459.8	298.6	161.2	52.09	3.095	9.507	0.021864		ANOVA table	SS	DF	MS	F (DFn, DFd)	P value	8	161.2	-23.80 to 346.2	No	ns	0.1032	459.8	298.6	161.2	52.09	7	7	3.095	9.507
	10	No	0.006198	684.7	410.8	273.9	73.9	3.706	7.845	0.016481		Time x Treatment	1133481	8	141685	F (8, 96) = 11.21	P<0.0001	10	273.9	-4.530 to 552.4	No	ns	0.0544	684.7	410.8	273.9	73.9	7	7	3.706	7.845
	12	No	0.001641	892.2	571.6	320.7	78.49	4.085	11.52	0.012225		Time	14401452	8	1800181	F (1.693, 20.32) = 142.4	P<0.0001	12	320.7	54.69 to 586.6	Yes	*	0.0147	892.2	571.6	320.7	78.49	7	7	4.085	11.52
	14	No	0.00269	1157	686.9	470	110	4.272	8.037	0.012225		Treatment	1665586	1	1665586	F (1, 12) = 16.22	P=0.0017	14	470	58.81 to 881.1	Yes	*	0.0239	1157	686.9	470	110	7	7	4.272	8.037
	16	No	0.007252	1498	901.7	596.6	164.6	3.625	7.657	0.016481		Subject	1232451	12	102704	F (12, 96) = 8.125	P<0.0001	16	596.6	-28.74 to 1222	No	ns	0.0634	1498	901.7	596.6	164.6	7	7	3.625	7.657
												Residual	1213521	96	12641
	PBS vs. oHSV											PBS (n=7) - oHSV (n=7)
	Days	Discovery?	P value	Mean of PBS (n=7)	Mean of oHSV (n=7)	Difference	SE of difference	t ratio	df	q value		Source of Variation	% of total variation	P value	P value summary	Significant?	Geisser-Greenhouse's epsilon	Šídák's multiple comparisons test	Mean Diff.	95.00% CI of diff.	Below threshold?	Summary	Adjusted P Value	Mean 1	Mean 2	Mean Diff.	SE of diff.	N1	N2	t	DF
	0	No	0.068061	179.3	139.5	39.77	18.63	2.135	7.39	0.153424		Time x Treatment	0.4381	0.6973	ns	No		0	39.77	-31.91 to 111.5	No	ns	0.4697	179.3	139.5	39.77	18.63	7	7	2.135	7.39
	2	No	0.031103	249.8	198.1	51.72	20.02	2.584	8.419	0.153424		Time	85.34	<0.0001	****	Yes	0.1766	2	51.72	-21.96 to 125.4	No	ns	0.2475	249.8	198.1	51.72	20.02	7	7	2.584	8.419
	4	No	0.268105	277.6	236.2	41.41	34.73	1.192	7.813	0.304635		Treatment	1.575	0.077	ns	No		4	41.41	-89.63 to 172.4	No	ns	0.9397	277.6	236.2	41.41	34.73	7	7	1.192	7.813
	6	No	0.154343	345.7	276.9	68.75	44.43	1.548	9.502	0.200426		Subject	5.05	<0.0001	****	Yes		6	68.75	-89.07 to 226.6	No	ns	0.7788	345.7	276.9	68.75	44.43	7	7	1.548	9.502
	8	No	0.038254	459.8	339.1	120.7	48.16	2.507	7.544	0.153424		ANOVA table	SS	DF	MS	F (DFn, DFd)	P value	8	120.7	-63.25 to 304.7	No	ns	0.296	459.8	339.1	120.7	48.16	7	7	2.507	7.544
	10	No	0.084392	684.7	540.8	143.9	71.75	2.006	7.084	0.153424		Time x Treatment	106945	8	13368	F (8, 96) = 0.6924	P=0.6973	10	143.9	-136.7 to 424.5	No	ns	0.5477	684.7	540.8	143.9	71.75	7	7	2.006	7.084
	12	No	0.055496	892.2	740.7	151.5	69.13	2.191	9.197	0.153424		Time	20832653	8	2604082	F (1.413, 16.95) = 134.9	P<0.0001	12	151.5	-96.34 to 399.3	No	ns	0.4018	892.2	740.7	151.5	69.13	7	7	2.191	9.197
	14	No	0.109873	1157	951.5	205.3	116.3	1.765	9.427	0.166457		Treatment	384517	1	384517	F (1, 12) = 3.743	P=0.0770	14	205.3	-208.8 to 619.5	No	ns	0.6492	1157	951.5	205.3	116.3	7	7	1.765	9.427
	16	No	0.4292	1498	1327	171.2	209.2	0.8184	11.91	0.433492		Subject	1232819	12	102735	F (12, 96) = 5.321	P<0.0001	16	171.2	-532.6 to 875.1	No	ns	0.9936	1498	1327	171.2	209.2	7	7	0.8184	11.91
												Residual	1853398	96	19306
	OSI-906 vs. oHSV+OSI-906											OSI-906 vs. oHSV+OSI-906
	Days	Discovery?	P value	Mean of OSI-906 (n=7)	Mean of oHSV+OSI (n=8)	Difference	SE of difference	t ratio	df	q value		Source of Variation	% of total variation	P value	P value summary	Significant?	Geisser-Greenhouse's epsilon	Šídák's multiple comparisons test	Mean Diff.	95.00% CI of diff.	Below threshold?	Summary	Adjusted P Value	Mean 1	Mean 2	Mean Diff.	SE of diff.	N1	N2	t	DF
	0	No	0.072107	162.9	127.4	35.49	17.88	1.985	11.23	0.081932		Time x Treatment	3.642	<0.0001	****	Yes		0	35.49	-25.43 to 96.40	No	ns	0.4901	162.9	127.4	35.49	17.88	7	8	1.985	11.23
	2	No	0.308389	197.7	168.7	28.95	27.31	1.06	13	0.311473		Time	73	<0.0001	****	Yes	0.2111	2	28.95	-61.34 to 119.2	No	ns	0.9638	197.7	168.7	28.95	27.31	7	8	1.06	13
	4	No	0.031272	195.7	151.6	44.13	18.18	2.428	12.41	0.040609		Treatment	8.826	0.0029	**	Yes		4	44.13	-16.52 to 104.8	No	ns	0.2487	195.7	151.6	44.13	18.18	7	8	2.428	12.41
	6	No	0.004818	249	124.9	124.1	35.99	3.45	11.98	0.012782		Subject	8.57	<0.0001	****	Yes		6	124.1	3.218 to 245.1	Yes	*	0.0425	249	124.9	124.1	35.99	7	8	3.45	11.98
	8	No	0.002514	298.6	156.5	142.1	38.09	3.732	13	0.012782		ANOVA table	SS	DF	MS	F (DFn, DFd)	P value	8	142.1	16.22 to 268.1	Yes	*	0.0224	298.6	156.5	142.1	38.09	7	8	3.732	13
	10	No	0.006611	410.8	257.8	152.9	46.86	3.264	12.25	0.012782		Time x Treatment	271371	8	33921	F (8, 104) = 6.177	P<0.0001	10	152.9	-3.789 to 309.7	No	ns	0.058	410.8	257.8	152.9	46.86	7	8	3.264	12.25
	12	No	0.01367	571.6	370	201.5	70.69	2.851	12.96	0.02071		Time	5440198	8	680025	F (1.689, 21.96) = 123.8	P<0.0001	12	201.5	-32.31 to 435.4	No	ns	0.1165	571.6	370	201.5	70.69	7	8	2.851	12.96
	14	No	0.007031	686.9	471	215.9	67.36	3.205	12.79	0.012782		Treatment	657732	1	657732	F (1, 13) = 13.39	P=0.0029	14	215.9	-7.504 to 439.3	No	ns	0.0615	686.9	471	215.9	67.36	7	8	3.205	12.79
	16	No	0.004538	901.7	587.7	314	91.45	3.433	12.8	0.012782		Subject	638640	13	49126	F (13, 104) = 8.946	P<0.0001	16	314	10.78 to 617.2	Yes	*	0.0401	901.7	587.7	314	91.45	7	8	3.433	12.8
												Residual	571100	104	5491
	oHSV vs. oHSV+OSI-906											oHSV (n=7) - oHSV+OSI-906 (n=8)
	Days	Discovery?	P value	Mean of oHSV (n=7)	Mean of oHSV +OSI (n=8)	Difference	SE of difference	t ratio	df	q value		Source of Variation	% of total variation	P value	P value summary	Significant?	Geisser-Greenhouse's epsilon	Šídák's multiple comparisons test	Mean Diff.	95.00% CI of diff.	Below threshold?	Summary	Adjusted P Value	Mean 1	Mean 2	Mean Diff.	SE of diff.	N1	N2	t	DF
	0	No	0.336247	139.5	127.4	12.12	12.06	1.005	11.03	0.075469		Time x Treatment Condition	11.23	<0.0001	****	Yes		0	12.12	-29.14 to 53.38	No	ns	0.975	139.5	127.4	12.12	12.06	7	8	1.005	11.03
	2	No	0.208227	198.1	168.7	29.37	21.72	1.352	9.311	0.052577		Time	64.77	<0.0001	****	Yes	0.1847	2	29.37	-48.21 to 106.9	No	ns	0.8777	198.1	168.7	29.37	21.72	7	8	1.352	9.311
	4	Yes	0.000332	236.2	151.6	84.6	17.42	4.856	12.74	0.000112		Treatment Condition	14.97	<0.0001	****	Yes		4	84.6	26.78 to 142.4	Yes	**	0.003	236.2	151.6	84.6	17.42	7	8	4.856	12.74
	6	Yes	0.000329	276.9	124.9	152.1	31.47	4.833	12.97	0.000112		Subject	4.232	<0.0001	****	Yes		6	152.1	48.02 to 256.2	Yes	**	0.003	276.9	124.9	152.1	31.47	7	8	4.833	12.97
	8	Yes	0.000152	339.1	156.5	182.6	32.52	5.617	11.08	7.7e-05		ANOVA table	SS	DF	MS	F (DFn, DFd)	P value	8	182.6	71.48 to 293.8	Yes	**	0.0014	339.1	156.5	182.6	32.52	7	8	5.617	11.08
	10	Yes	5e-05	540.8	257.8	282.9	43.39	6.521	10.67	3.6e-05		Time x Treatment Condition	1695962	8	211995	F (8, 104) = 18.21	P<0.0001	10	282.9	133.3 to 432.6	Yes	***	0.0004	540.8	257.8	282.9	43.39	7	8	6.521	10.67
	12	Yes	5.4e-05	740.7	370	370.7	60.14	6.164	11.71	3.6e-05		Time	9780583	8	1222573	F (1.478, 19.21) = 105.0	P<0.0001	12	370.7	167.6 to 573.8	Yes	***	0.0005	740.7	370	370.7	60.14	7	8	6.164	11.71
	14	Yes	3.5e-05	951.5	471	480.5	77.24	6.221	12.67	3.6e-05		Treatment Condition	2260445	1	2260445	F (1, 13) = 45.99	P<0.0001	14	480.5	223.9 to 737.1	Yes	***	0.0003	951.5	471	480.5	77.24	7	8	6.221	12.67
	16	Yes	0.001199	1327	587.7	739.4	158.3	4.672	8.905	0.000346		Subject	639008	13	49154	F (13, 104) = 4.221	P<0.0001	16	739.4	166.8 to 1312	Yes	*	0.0107	1327	587.7	739.4	158.3	7	8	4.672	8.905
												Residual	1210977	104	11644
	MDA468 Mammary Fatpad
	Unpaired Student's T-Test with Welch Correction and Two-stage step-up (Benjamini, Krieger, and Yekutieli) False Discovery Test (Desired FDR (Q) = 1%)											Two-way ANOVA
	PBS vs. oHSV+OSI-906											PBS (n = 7) - oHSV+OSI-906 (n=9)
	Days	Discovery?	P value	Mean of PBS (n=7)	Mean of oHSV+OSI (n=9)	Difference	SE of difference	t ratio	df	q value		Source of Variation	% of total variation	P value	P value summary	Significant?	Geisser-Greenhouse's epsilon	Šídák's multiple comparisons test	Mean Diff.	95.00% CI of diff.	Below threshold?	Summary	Adjusted P Value	Mean 1	Mean 2	Mean Diff.	SE of diff.	N1	N2	t	DF
	0	No	0.472692	132.2	121.4	10.79	14.56	0.7408	12.32	0.102304		Time x Treatment	14.43	<0.0001	****	Yes		0	10.79	-41.30 to 62.87	No	ns	0.9999	132.2	121.4	10.79	14.56	7	9	0.7408	12.32
	2	No	0.152794	151	125.5	25.54	16.57	1.541	10.52	0.035613		Time	24.25	<0.0001	****	Yes	0.1844	2	25.54	-36.08 to 87.16	No	ns	0.9019	151	125.5	25.54	16.57	7	9	1.541	10.52
	4	Yes	0.035858	172	127.6	44.37	18.34	2.419	10.12	0.009054		Treatment	46.59	<0.0001	****	Yes		4	44.37	-24.57 to 113.3	No	ns	0.4002	172	127.6	44.37	18.34	7	9	2.419	10.12
	6	Yes	0.007471	201.9	127.4	74.56	22.14	3.367	9.695	0.002058		Subject	15.31	<0.0001	****	Yes		6	74.56	-9.692 to 158.8	No	ns	0.0997	201.9	127.4	74.56	22.14	7	9	3.367	9.695
	8	Yes	0.00164	216.6	119.8	96.82	22.47	4.31	9.724	0.000497		ANOVA table	SS	DF	MS	F (DFn, DFd)	P value	8	96.82	11.42 to 182.2	Yes	*	0.0227	216.6	119.8	96.82	22.47	7	9	4.31	9.724
	10	Yes	0.000399	245.6	110.9	134.7	25.32	5.32	9.518	0.000134		Time x Treatment	392816	13	30217	F (13, 182) = 63.38	P<0.0001	10	134.7	37.83 to 231.5	Yes	**	0.0056	245.6	110.9	134.7	25.32	7	9	5.32	9.518
	12	Yes	0.000234	261.5	102.5	159	27.12	5.862	9.065	8.8e-05		Time	660276	13	50790	F (2.397, 33.56) = 106.5	P<0.0001	12	159	53.63 to 264.3	Yes	**	0.0033	261.5	102.5	159	27.12	7	9	5.862	9.065
	14	Yes	0.00011	280.2	104	176.2	28.16	6.259	9.635	4.8e-05		Treatment	1268320	1	1268320	F (1, 14) = 42.59	P<0.0001	14	176.2	68.92 to 283.6	Yes	**	0.0015	280.2	104	176.2	28.16	7	9	6.259	9.635
	16	Yes	4.2e-05	306.7	104.9	201.7	27.85	7.243	9.251	3.2e-05		Subject	416900	14	29779	F (14, 182) = 62.46	P<0.0001	16	201.7	94.24 to 309.2	Yes	***	0.0006	306.7	104.9	201.7	27.85	7	9	7.243	9.251
	18	Yes	5.9e-05	329	111.1	217.8	30.81	7.071	8.971	3.3e-05		Residual	86767	182	476.7			18	217.8	97.78 to 337.9	Yes	***	0.0008	329	111.1	217.8	30.81	7	9	7.071	8.971
	21	Yes	6.6e-05	358.5	128.7	229.8	34.73	6.616	9.78	3.3e-05								21	229.8	97.99 to 361.6	Yes	***	0.0009	358.5	128.7	229.8	34.73	7	9	6.616	9.78
	23	Yes	8e-06	391.2	145.1	246.1	33.1	7.435	11.91	8e-06								23	246.1	126.8 to 365.5	Yes	***	0.0001	391.2	145.1	246.1	33.1	7	9	7.435	11.91
	25	Yes	2e-06	422.8	161.9	260.9	31.84	8.194	12.44	4e-06								25	260.9	147.3 to 374.6	Yes	****	<0.0001	422.8	161.9	260.9	31.84	7	9	8.194	12.44
	28	Yes	1e-06	430.7	185.6	245.2	30.18	8.124	13.53	4e-06								28	245.2	139.4 to 351.0	Yes	****	<0.0001	430.7	185.6	245.2	30.18	7	9	8.124	13.53
	PBS vs. OSI-906											PBS (n=7) - OSI-906 (n=8)
	Days	Discovery?	P value	Mean of PBS (n=7)	Mean of OSI-906 (n=8)	Difference	SE of difference	t ratio	df	q value		Source of Variation	% of total variation	P value	P value summary	Significant?	Geisser-Greenhouse's epsilon	Šídák's multiple comparisons test	Mean Diff.	95.00% CI of diff.	Below threshold?	Summary	Adjusted P Value	Mean 1	Mean 2	Mean Diff.	SE of diff.	N1	N2	t	DF
	0	No	0.549216	132.2	121.1	11.07	18	0.6152	12.8	0.554708		Time x Treatment	3.673	<0.0001	****	Yes		0	11.07	-52.77 to 74.92	No	ns	>0.9999	132.2	121.1	11.07	18	7	8	0.6152	12.8
	2	No	0.499403	151	136.2	14.84	21.35	0.6949	12.95	0.543197		Time	45.43	<0.0001	****	Yes	0.1448	2	14.84	-60.72 to 90.39	No	ns	>0.9999	151	136.2	14.84	21.35	7	8	0.6949	12.95
	4	No	0.486613	172	154.4	17.58	24.54	0.7163	12.87	0.543197		Treatment	9.263	0.0971	ns	No		4	17.58	-69.39 to 104.5	No	ns	>0.9999	172	154.4	17.58	24.54	7	8	0.7163	12.87
	6	No	0.429241	201.9	178.2	23.76	29.12	0.816	12.97	0.543197		Subject	37.68	<0.0001	****	Yes		6	23.76	-79.23 to 126.7	No	ns	0.9996	201.9	178.2	23.76	29.12	7	8	0.816	12.97
	8	No	0.386494	216.6	187.9	28.71	32	0.8971	12.6	0.543197		ANOVA table	SS	DF	MS	F (DFn, DFd)	P value	8	28.71	-85.19 to 142.6	No	ns	0.9989	216.6	187.9	28.71	32	7	8	0.8971	12.6
	10	No	0.173886	245.6	192.3	53.29	36.95	1.442	12.49	0.307343		Time x Treatment	93534	13	7195	F (13, 169) = 8.813	P<0.0001	10	53.29	-78.49 to 185.1	No	ns	0.931	245.6	192.3	53.29	36.95	7	8	1.442	12.49
	12	No	0.226493	261.5	208.3	53.16	41.74	1.274	12.21	0.355846		Time	1156679	13	88975	F (1.883, 24.48) = 109.0	P<0.0001	12	53.16	-96.43 to 202.7	No	ns	0.9726	261.5	208.3	53.16	41.74	7	8	1.274	12.21
	14	No	0.138473	280.2	211.2	69.01	43.49	1.587	12.02	0.279715		Treatment	235856	1	235856	F (1, 13) = 3.196	P=0.0971	14	69.01	-87.41 to 225.4	No	ns	0.8759	280.2	211.2	69.01	43.49	7	8	1.587	12.02
	16	No	0.061382	306.7	216	90.64	43.91	2.064	11.97	0.144656		Subject	959382	13	73799	F (13, 169) = 90.40	P<0.0001	16	90.64	-67.47 to 248.8	No	ns	0.588	306.7	216	90.64	43.91	7	8	2.064	11.97
	18	No	0.054947	329	227.9	101.1	47.65	2.122	12.2	0.144656		Residual	137969	169	816.4			18	101.1	-69.68 to 271.9	No	ns	0.5467	329	227.9	101.1	47.65	7	8	2.122	12.2
	21	No	0.048863	358.5	252.1	106.4	48.84	2.179	12.67	0.144656								21	106.4	-67.20 to 280.0	No	ns	0.5041	358.5	252.1	106.4	48.84	7	8	2.179	12.67
	23	No	0.03627	391.2	273.5	117.7	49.67	2.369	11.51	0.144656								23	117.7	-62.82 to 298.2	No	ns	0.4038	391.2	273.5	117.7	49.67	7	8	2.369	11.51
	25	No	0.013573	422.8	289.3	133.5	45.95	2.906	11.63	0.143714								25	133.5	-33.05 to 300.1	No	ns	0.1741	422.8	289.3	133.5	45.95	7	8	2.906	11.63
	28	No	0.020327	430.7	311.1	119.7	44.12	2.713	10.91	0.143714								28	119.7	-42.80 to 282.2	No	ns	0.2499	430.7	311.1	119.7	44.12	7	8	2.713	10.91
	PBS vs. oHSV											PBS (n=7) - oHSV (n=7)
	Days	Discovery?	P value	Mean of PBS (n=7)	Mean of oHSV (n=7)	Difference	SE of difference	t ratio	df	q value		Source of Variation	% of total variation	P value	P value summary	Significant?	Geisser-Greenhouse's epsilon	Šídák's multiple comparisons test	Mean Diff.	95.00% CI of diff.	Below threshold?	Summary	Adjusted P Value	Mean 1	Mean 2	Mean Diff.	SE of diff.	N1	N2	t	DF
	0	No	0.905308	132.2	129.6	2.608	21.38	0.122	10.11	0.949998		Time x Treatment	4.584	<0.0001	****	Yes		0	2.608	-77.78 to 82.99	No	ns	>0.9999	132.2	129.6	2.608	21.38	7	7	0.122	10.11
	2	No	0.940592	151	149.3	1.759	23.07	0.07621	11.22	0.949998		Time	49.68	<0.0001	****	Yes	0.1342	2	1.759	-82.63 to 86.15	No	ns	>0.9999	151	149.3	1.759	23.07	7	7	0.07621	11.22
	4	No	0.869761	172	176.2	-4.282	25.53	0.1677	11.34	0.949998		Treatment	10.46	0.0618	ns	No		4	-4.282	-97.40 to 88.83	No	ns	>0.9999	172	176.2	-4.282	25.53	7	7	0.1677	11.34
	6	No	0.45818	201.9	179.7	22.23	28.99	0.7669	11.84	0.588969		Subject	29.6	<0.0001	****	Yes		6	22.23	-82.39 to 126.8	No	ns	0.9998	201.9	179.7	22.23	28.99	7	7	0.7669	11.84
	8	No	0.228203	216.6	178.1	38.49	30.27	1.272	11.68	0.322679		ANOVA table	SS	DF	MS	F (DFn, DFd)	P value	8	38.49	-71.11 to 148.1	No	ns	0.9734	216.6	178.1	38.49	30.27	7	7	1.272	11.68
	10	No	0.084178	245.6	180.8	64.78	34.32	1.887	11.69	0.132253		Time x Treatment	99948	13	7688	F (13, 156) = 9.695	P<0.0001	10	64.78	-59.49 to 189.1	No	ns	0.708	245.6	180.8	64.78	34.32	7	7	1.887	11.69
	12	No	0.036991	261.5	181	80.51	34.32	2.346	12	0.079208		Time	1083178	13	83321	F (1.745, 20.94) = 105.1	P<0.0001	12	80.51	-42.98 to 204.0	No	ns	0.41	261.5	181	80.51	34.32	7	7	2.346	12
	14	No	0.033121	280.2	190.4	89.8	37.24	2.412	11.8	0.079208		Treatment	228160	1	228160	F (1, 12) = 4.241	P=0.0618	14	89.8	-44.70 to 224.3	No	ns	0.376	280.2	190.4	89.8	37.24	7	7	2.412	11.8
	16	No	0.021511	306.7	205	101.7	38.32	2.653	11.65	0.079208		Subject	645534	12	53794	F (12, 156) = 67.84	P<0.0001	16	101.7	-37.17 to 240.5	No	ns	0.2625	306.7	205	101.7	38.32	7	7	2.653	11.65
	18	No	0.021136	329	221.7	107.3	40.43	2.653	11.94	0.079208		Residual	123705	156	793			18	107.3	-38.39 to 252.9	No	ns	0.2585	329	221.7	107.3	40.43	7	7	2.653	11.94
	21	No	0.044813	358.5	258.5	100.1	44.64	2.242	11.91	0.079208								21	100.1	-60.85 to 261.0	No	ns	0.4737	358.5	258.5	100.1	44.64	7	7	2.242	11.91
	23	No	0.022428	391.2	272.7	118.5	44.65	2.654	11	0.079208								23	118.5	-45.59 to 282.6	No	ns	0.2721	391.2	272.7	118.5	44.65	7	7	2.654	11
	25	No	0.018191	422.8	296.7	126.1	45.04	2.8	10.37	0.079208								25	126.1	-42.00 to 294.2	No	ns	0.2266	422.8	296.7	126.1	45.04	7	7	2.8	10.37
	28	No	0.043669	430.7	325	105.8	45.35	2.333	9.299	0.079208								28	105.8	-68.94 to 280.5	No	ns	0.4648	430.7	325	105.8	45.35	7	7	2.333	9.299
	OSI-906 vs. oHSV+OSI-906											OSI-906 (8) vs. oHSV+OSI-906 (9)
	Days	Discovery?	P value	Mean of OSI-906 (n=7)	Mean of oHSV+OSI (n=9)	Difference	SE of difference	t ratio	df	q value		Source of Variation	% of total variation	P value	P value summary	Significant?	Geisser-Greenhouse's epsilon	Šídák's multiple comparisons test	Mean Diff.	95.00% CI of diff.	Below threshold?	Summary	Adjusted P Value	Mean 1	Mean 2	Mean Diff.	SE of diff.	N1	N2	t	DF
	0	No	0.986538	121.1	121.4	-0.2865	16.64	0.01722	12.26	0.996403		Time x Treatment	6.287	<0.0001	****	Yes		0	-0.2865	-59.86 to 59.29	No	ns	>0.9999	121.1	121.4	-0.2865	16.64	8	9	0.01722	12.26
	2	No	0.572667	136.2	125.5	10.7	18.41	0.5814	11	0.622885		Time	16.06	<0.0001	****	Yes	0.1271	2	10.7	-56.95 to 78.36	No	ns	>0.9999	136.2	125.5	10.7	18.41	8	9	0.5814	11
	4	No	0.231427	154.4	127.6	26.79	21.08	1.271	10.38	0.272698		Treatment	23.23	0.0173	*	Yes		4	26.79	-51.86 to 105.4	No	ns	0.9749	154.4	127.6	26.79	21.08	8	9	1.271	10.38
	6	No	0.062871	178.2	127.4	50.8	24.38	2.084	10.36	0.080818		Subject	48.66	<0.0001	****	Yes		6	50.8	-40.24 to 141.8	No	ns	0.5971	178.2	127.4	50.8	24.38	8	9	2.084	10.36
	8	No	0.03438	187.9	119.8	68.12	27.66	2.463	9.625	0.048614		ANOVA table	SS	DF	MS	F (DFn, DFd)	P value	8	68.12	-37.34 to 173.6	No	ns	0.3872	187.9	119.8	68.12	27.66	8	9	2.463	9.625
	10	No	0.030492	192.3	110.9	81.4	31.96	2.547	9.349	0.047907		Time x Treatment	114615	13	8817	F (13, 195) = 14.27	P<0.0001	10	81.4	-41.56 to 204.3	No	ns	0.3518	192.3	110.9	81.4	31.96	8	9	2.547	9.349
	12	No	0.017307	208.3	102.5	105.8	36.2	2.923	8.821	0.037021		Time	292779	13	22521	F (1.652, 24.78) = 36.45	P<0.0001	12	105.8	-36.04 to 247.6	No	ns	0.2168	208.3	102.5	105.8	36.2	8	9	2.923	8.821
	14	No	0.020945	211.2	104	107.2	38.42	2.791	9.035	0.037021		Treatment	423461	1	423461	F (1, 15) = 7.160	P=0.0173	14	107.2	-42.16 to 256.6	No	ns	0.2565	211.2	104	107.2	38.42	8	9	2.791	9.035
	16	No	0.018709	216	104.9	111.1	38.59	2.878	8.771	0.037021		Subject	887096	15	59140	F (15, 195) = 95.70	P<0.0001	16	111.1	-40.44 to 262.6	No	ns	0.2323	216	104.9	111.1	38.59	8	9	2.878	8.771
	18	No	0.020283	227.9	111.1	116.7	41.26	2.829	8.756	0.037021		Residual	120499	195	617.9			18	116.7	-45.36 to 278.8	No	ns	0.2494	227.9	111.1	116.7	41.26	8	9	2.829	8.756
	21	No	0.015405	252.1	128.7	123.4	42.11	2.931	9.757	0.037021								21	123.4	-36.51 to 283.3	No	ns	0.1953	252.1	128.7	123.4	42.11	8	9	2.931	9.757
	23	No	0.020108	273.5	145.1	128.5	46.59	2.757	10.06	0.037021								23	128.5	-46.89 to 303.8	No	ns	0.2475	273.5	145.1	128.5	46.59	8	9	2.757	10.06
	25	No	0.01439	289.3	161.9	127.4	43.59	2.923	10.59	0.037021								25	127.4	-34.39 to 289.2	No	ns	0.1837	289.3	161.9	127.4	43.59	8	9	2.923	10.59
	28	No	0.015272	311.1	185.6	125.5	43.7	2.872	10.93	0.037021								28	125.5	-35.35 to 286.4	No	ns	0.1938	311.1	185.6	125.5	43.7	8	9	2.872	10.93
	oHSV vs. oHSV+OSI-906											oHSV (n=7) - oHSV+OSI-906 (n=9)
	Days	Discovery?	P value	Mean of oHSV (n=7)	Mean of oHSV +OSI (n=9)	Difference	SE of difference	t ratio	df	q value		Source of Variation	% of total variation	P value	P value summary	Significant?	Geisser-Greenhouse's epsilon	Šídák's multiple comparisons test	Mean Diff.	95.00% CI of diff.	Below threshold?	Summary	Adjusted P Value	Mean 1	Mean 2	Mean Diff.	SE of diff.	N1	N2	t	DF
	0	No	0.695706	129.6	121.4	8.179	20.25	0.404	8.973	0.702663		Time x Treatment	6.388	<0.0001	****	Yes		0	8.179	-70.73 to 87.09	No	ns	>0.9999	129.6	121.4	8.179	20.25	7	9	0.404	8.973
	2	No	0.273991	149.3	125.5	23.78	20.38	1.167	8.778	0.298018		Time	21.05	<0.0001	****	Yes	0.1119	2	23.78	-56.22 to 103.8	No	ns	0.9887	149.3	125.5	23.78	20.38	7	9	1.167	8.778
	4	No	0.057552	176.2	127.6	48.65	22.22	2.19	8.62	0.069617		Treatment	26.93	0.0084	**	Yes		4	48.65	-39.09 to 136.4	No	ns	0.5639	176.2	127.6	48.65	22.22	7	9	2.19	8.62
	6	No	0.059081	179.7	127.4	52.33	24.23	2.16	8.989	0.069617		Subject	40.22	<0.0001	****	Yes		6	52.33	-42.02 to 146.7	No	ns	0.5737	179.7	127.4	52.33	24.23	7	9	2.16	8.989
	8	No	0.049749	178.1	119.8	58.33	25.63	2.276	8.73	0.069617		ANOVA table	SS	DF	MS	F (DFn, DFd)	P value	8	58.33	-42.45 to 159.1	No	ns	0.5105	178.1	119.8	58.33	25.63	7	9	2.276	8.73
	10	No	0.039872	180.8	110.9	69.9	28.88	2.42	8.58	0.062644		Time x Treatment	91056	13	7004	F (13, 182) = 12.00	P<0.0001	10	69.9	-44.35 to 184.1	No	ns	0.4343	180.8	110.9	69.9	28.88	7	9	2.42	8.58
	12	No	0.018359	181	102.5	78.46	27.31	2.873	9.015	0.037086		Time	300125	13	23087	F (1.454, 20.36) = 39.55	P<0.0001	12	78.46	-27.81 to 184.7	No	ns	0.2285	181	102.5	78.46	27.31	7	9	2.873	9.015
	14	No	0.021973	190.4	104	86.44	31.17	2.773	8.859	0.038838		Treatment	383857	1	383857	F (1, 14) = 9.375	P=0.0084	14	86.44	-35.55 to 208.4	No	ns	0.2673	190.4	104	86.44	31.17	7	9	2.773	8.859
	16	No	0.013542	205	104.9	100.1	32.08	3.119	8.335	0.031915		Subject	573248	14	40946	F (14, 182) = 70.15	P<0.0001	16	100.1	-28.11 to 228.2	No	ns	0.1738	205	104.9	100.1	32.08	7	9	3.119	8.335
	18	No	0.008621	221.7	111.1	110.6	32.66	3.385	8.591	0.031915		Residual	106235	182	583.7			18	110.6	-18.57 to 239.7	No	ns	0.1142	221.7	111.1	110.6	32.66	7	9	3.385	8.591
	21	No	0.00658	258.5	128.7	129.7	37.17	3.49	9.221	0.031915								21	129.7	-13.87 to 273.3	No	ns	0.0883	258.5	128.7	129.7	37.17	7	9	3.49	9.221
	23	No	0.011838	272.7	145.1	127.6	41.19	3.099	9.581	0.031915								23	127.6	-29.61 to 284.9	No	ns	0.1536	272.7	145.1	127.6	41.19	7	9	3.099	9.581
	25	No	0.011029	296.7	161.9	134.8	42.63	3.162	9.322	0.031915								25	134.8	-29.35 to 299.0	No	ns	0.1438	296.7	161.9	134.8	42.63	7	9	3.162	9.322
	28	No	0.012287	325	185.6	139.4	44.94	3.102	9.241	0.031915								28	139.4	-34.08 to 312.9	No	ns	0.1589	325	185.6	139.4	44.94	7	9	3.102	9.241
	GBM12 Subcutaneous
	Unpaired Student's T-Test with Welch Correction and Two-stage step-up (Benjamini, Krieger, and Yekutieli) False Discovery Test (Desired FDR (Q) = 1%)											Two-way ANOVA
	PBS vs. oHSV+OSI-906											PBS (n = 7) - oHSV+OSI-906 (n=9)
	Days	Discovery?	P value	Mean of PBS (n=7)	Mean of oHSV+OSI (n=9)	Difference	SE of difference	t ratio	df	q value		Source of Variation	% of total variation	P value	P value summary	Significant?	Geisser-Greenhouse's epsilon	Šídák's multiple comparisons test	Mean Diff.	95.00% CI of diff.	Below threshold?	Summary	Adjusted P Value	Mean 1	Mean 2	Mean Diff.	SE of diff.	N1	N2	t	DF
	1	No	0.365508	100.5	105.2	-4.69	4.999	0.9382	12.8	0.06712		Time x Treatment	17.82	<0.0001	****	Yes		1	-4.69	-21.79 to 12.41	No	ns	0.9933	100.5	105.2	-4.69	4.999	7	8	0.9382	12.8
	3	No	0.301128	120.7	112.8	7.924	7.331	1.081	11.91	0.060828		Time	63.07	<0.0001	****	Yes	0.1349	3	7.924	-17.54 to 33.38	No	ns	0.9806	120.7	112.8	7.924	7.331	7	8	1.081	11.91
	5	Yes	5e-06	155.3	109.9	45.41	5.831	7.788	11.97	3e-06		Treatment	17.64	<0.0001	****	Yes		5	45.41	25.18 to 65.64	Yes	****	<0.0001	155.3	109.9	45.41	5.831	7	8	7.788	11.97
	8	Yes	<0.000001	190.2	122	68.21	7.289	9.358	12.02	<0.000001		Subject	1.974	<0.0001	****	Yes		8	68.21	42.94 to 93.48	Yes	****	<0.0001	190.2	122	68.21	7.289	7	8	9.358	12.02
	10	Yes	<0.000001	245.6	136	109.6	9.929	11.04	12.54	<0.000001		ANOVA table	SS	DF	MS	F (DFn, DFd)	P value	10	109.6	75.48 to 143.7	Yes	****	<0.0001	245.6	136	109.6	9.929	7	8	11.04	12.54
	12	Yes	<0.000001	314.9	145.9	169	13.86	12.19	9.644	<0.000001		Time x Treatment	3833098	10	383310	F (10, 130) = 64.96	P<0.0001	12	169	118.3 to 219.8	Yes	****	<0.0001	314.9	145.9	169	13.86	7	8	12.19	9.644
	15	Yes	1e-05	442	178.7	263.3	25.7	10.25	7.597	4e-06		Time	13570222	10	1357022	F (1.349, 17.54) = 230.0	P<0.0001	15	263.3	161.6 to 365.0	Yes	***	0.0001	442	178.7	263.3	25.7	7	8	10.25	7.597
	17	Yes	1.2e-05	627.8	205.3	422.6	39.59	10.68	7.129	4e-06		Treatment	3796052	1	3796052	F (1, 13) = 116.2	P<0.0001	17	422.6	262.0 to 583.1	Yes	***	0.0001	627.8	205.3	422.6	39.59	7	8	10.68	7.129
	19	Yes	0.000114	876.5	259	617.5	75.51	8.178	6.547	2.6e-05		Subject	424704	13	32670	F (13, 130) = 5.536	P<0.0001	19	617.5	299.9 to 935.1	Yes	**	0.0013	876.5	259	617.5	75.51	7	8	8.178	6.547
	22	Yes	8.3e-05	1127	385.4	741.9	89.1	8.327	6.794	2.1e-05		Residual	767115	130	5901			22	741.9	373.2 to 1111	Yes	***	0.0009	1127	385.4	741.9	89.1	7	8	8.327	6.794
	24	Yes	2.7e-05	1474	570.7	903.6	105.5	8.564	7.994	8e-06								24	903.6	493.7 to 1313	Yes	***	0.0003	1474	570.7	903.6	105.5	7	8	8.564	7.994
	PBS vs. OSI-906											PBS (n=7) - OSI-906 (n=8)
	Days	Discovery?	P value	Mean of PBS (n=7)	Mean of OSI-906 (n=8)	Difference	SE of difference	t ratio	df	q value		Source of Variation	% of total variation	P value	P value summary	Significant?	Geisser-Greenhouse's epsilon	Šídák's multiple comparisons test	Mean Diff.	95.00% CI of diff.	Below threshold?	Summary	Adjusted P Value	Mean 1	Mean 2	Mean Diff.	SE of diff.	N1	N2	t	DF
	1	No	0.60618	100.5	98.31	2.188	4.101	0.5336	9.26	0.118904		Time x Treatment	3.544	<0.0001	****	Yes		1	2.188	-13.00 to 17.38	No	ns	>0.9999	100.5	98.31	2.188	4.101	7	8	0.5336	9.26
	3	No	0.647495	120.7	118.6	2.119	4.467	0.4744	8.284	0.118904		Time	89.31	<0.0001	****	Yes	0.1482	3	2.119	-15.02 to 19.26	No	ns	>0.9999	120.7	118.6	2.119	4.467	7	8	0.4744	8.284
	5	Yes	0.005179	155.3	139.7	15.53	4.626	3.358	12.92	0.001213		Treatment	3.643	0.0002	***	Yes		5	15.53	-0.2589 to 31.33	No	ns	0.0555	155.3	139.7	15.53	4.626	7	8	3.358	12.92
	8	Yes	0.000182	190.2	162.6	27.63	4.962	5.568	10.77	0.00013		Subject	1.84	<0.0001	****	Yes		8	27.63	9.983 to 45.27	Yes	**	0.002	190.2	162.6	27.63	4.962	7	8	5.568	10.77
	10	Yes	4.4e-05	245.6	186.5	59.13	8.71	6.789	10.18	8.9e-05		ANOVA table	SS	DF	MS	F (DFn, DFd)	P value	10	59.13	27.70 to 90.55	Yes	***	0.0005	245.6	186.5	59.13	8.71	7	8	6.789	10.18
	12	Yes	0.000192	314.9	234	80.91	13.8	5.864	9.519	0.00013		Time x Treatment	877343	10	87734	F (10, 130) = 12.85	P<0.0001	12	80.91	30.20 to 131.6	Yes	**	0.0021	314.9	234	80.91	13.8	7	8	5.864	9.519
	15	Yes	0.000844	442	304.9	137.1	25.61	5.354	7.503	0.000341		Time	22107852	10	2210785	F (1.482, 19.27) = 323.8	P<0.0001	15	137.1	35.30 to 238.9	Yes	**	0.0092	442	304.9	137.1	25.61	7	8	5.354	7.503
	17	Yes	0.000743	627.8	403.2	224.7	39.31	5.715	6.95	0.000341		Treatment	901692	1	901692	F (1, 13) = 25.73	P=0.0002	17	224.7	63.53 to 385.8	Yes	**	0.0081	627.8	403.2	224.7	39.31	7	8	5.715	6.95
	19	Yes	0.005165	876.5	571.9	304.5	79.23	3.844	7.797	0.001213		Subject	455565	13	35043	F (13, 130) = 5.133	P<0.0001	19	304.5	-5.961 to 615.0	No	ns	0.0554	876.5	571.9	304.5	79.23	7	8	3.844	7.797
	22	Yes	0.005404	1127	772.8	354.5	91.06	3.893	7.357	0.001213		Residual	887475	130	6827			22	354.5	-10.29 to 719.2	No	ns	0.0579	1127	772.8	354.5	91.06	7	8	3.893	7.357
	24	Yes	0.004114	1474	1053	421.7	114.2	3.693	10.06	0.001213								24	421.7	8.452 to 834.9	Yes	*	0.0443	1474	1053	421.7	114.2	7	8	3.693	10.06
	PBS vs. oHSV											PBS (n=7) - oHSV (n=7)
	Days	Discovery?	P value	Mean of PBS (n=7)	Mean of oHSV (n=7)	Difference	SE of difference	t ratio	df	q value		Source of Variation	% of total variation	P value	P value summary	Significant?	Geisser-Greenhouse's epsilon	Šídák's multiple comparisons test	Mean Diff.	95.00% CI of diff.	Below threshold?	Summary	Adjusted P Value	Mean 1	Mean 2	Mean Diff.	SE of diff.	N1	N2	t	DF
	1	Yes	0.016092	100.5	119.3	-18.77	6.546	2.868	10.42	0.008126		Time x Treatment	5.122	<0.0001	****	Yes		1	-18.77	-42.24 to 4.699	No	ns	0.1634	100.5	119.3	-18.77	6.546	7	7	2.868	10.42
	3	No	0.666184	120.7	124.7	-4.035	9.045	0.4461	8.89	0.244671		Time	82.46	<0.0001	****	Yes	0.1246	3	-4.035	-37.96 to 29.89	No	ns	>0.9999	120.7	124.7	-4.035	9.045	7	7	0.4461	8.89
	5	No	0.173667	155.3	141.3	14	9.335	1.5	7.651	0.070161		Treatment	5.101	0.0006	***	Yes		5	14	-22.84 to 50.85	No	ns	0.8773	155.3	141.3	14	9.335	7	7	1.5	7.651
	8	No	0.053078	190.2	160.3	29.95	13	2.304	7.321	0.023826		Subject	2.839	<0.0001	****	Yes		8	29.95	-22.22 to 82.13	No	ns	0.4511	190.2	160.3	29.95	13	7	7	2.304	7.321
	10	Yes	9.3e-05	245.6	183.5	62.15	10.81	5.75	11.96	0.000101		ANOVA table	SS	DF	MS	F (DFn, DFd)	P value	10	62.15	24.64 to 99.65	Yes	**	0.001	245.6	183.5	62.15	10.81	7	7	5.75	11.96
	12	Yes	5.2e-05	314.9	212.2	102.7	16.78	6.117	11.99	0.000101		Time x Treatment	1198250	10	119825	F (10, 120) = 13.73	P<0.0001	12	102.7	44.46 to 160.9	Yes	***	0.0006	314.9	212.2	102.7	16.78	7	7	6.117	11.99
	15	Yes	0.0001	442	262.6	179.4	30.82	5.821	11.41	0.000101		Time	19293082	10	1929308	F (1.246, 14.95) = 221.1	P<0.0001	15	179.4	71.32 to 287.5	Yes	**	0.0011	442	262.6	179.4	30.82	7	7	5.821	11.41
	17	Yes	7e-05	627.8	339.5	288.3	45.62	6.321	10.51	0.000101		Treatment	1193356	1	1193356	F (1, 12) = 21.56	P=0.0006	17	288.3	125.1 to 451.5	Yes	***	0.0008	627.8	339.5	288.3	45.62	7	7	6.321	10.51
	19	Yes	0.001186	876.5	482	394.5	90.5	4.359	10.81	0.000958		Subject	664278	12	55356	F (12, 120) = 6.343	P<0.0001	19	394.5	72.96 to 716.0	Yes	*	0.013	876.5	482	394.5	90.5	7	7	4.359	10.81
	22	Yes	0.003186	1127	713.4	413.9	111.7	3.707	11.56	0.001839		Residual	1047305	120	8728			22	413.9	23.49 to 804.4	Yes	*	0.0345	1127	713.4	413.9	111.7	7	7	3.707	11.56
	24	Yes	0.003074	1474	999.8	474.5	127.6	3.719	11.66	0.001839								24	474.5	29.26 to 919.8	Yes	*	0.0333	1474	999.8	474.5	127.6	7	7	3.719	11.66
	OSI-906 vs. oHSV+OSI-906											OSI-906 (8) vs. oHSV+OSI-906 (9)
	Days	Discovery?	P value	Mean of OSI-906 (n=7)	Mean of oHSV+OSI (n=9)	Difference	SE of difference	t ratio	df	q value		Source of Variation	% of total variation	P value	P value summary	Significant?	Geisser-Greenhouse's epsilon	Šídák's multiple comparisons test	Mean Diff.	95.00% CI of diff.	Below threshold?	Summary	Adjusted P Value	Mean 1	Mean 2	Mean Diff.	SE of diff.	N1	N2	t	DF
	1	No	0.109747	98.31	105.2	-6.879	3.953	1.74	10.99	0.022169		Time x Treatment	10.32	<0.0001	****	Yes		1	-6.879	-20.87 to 7.109	No	ns	0.7216	98.31	105.2	-6.879	3.953	8	8	1.74	10.99
	3	No	0.38634	118.6	112.8	5.805	6.345	0.9148	8.215	0.070946		Time	75.66	<0.0001	****	Yes	0.1633	3	5.805	-18.61 to 30.22	No	ns	0.9954	118.6	112.8	5.805	6.345	8	8	0.9148	8.215
	5	Yes	0.000231	139.7	109.9	29.88	5.827	5.127	12.3	5.2e-05		Treatment	9.804	<0.0001	****	Yes		5	29.88	9.779 to 49.97	Yes	**	0.0025	139.7	109.9	29.88	5.827	8	8	5.127	12.3
	8	Yes	0.000119	162.6	122	40.58	6.622	6.129	9.839	3e-05		Subject	1.168	<0.0001	****	Yes		8	40.58	16.47 to 64.69	Yes	**	0.0013	162.6	122	40.58	6.622	8	8	6.129	9.839
	10	Yes	3.4e-05	186.5	136	50.46	8.036	6.279	12.46	1e-05		ANOVA table	SS	DF	MS	F (DFn, DFd)	P value	10	50.46	22.82 to 78.10	Yes	***	0.0004	186.5	136	50.46	8.036	8	8	6.279	12.46
	12	Yes	<0.000001	234	145.9	88.11	9.597	9.182	13.99	<0.000001		Time x Treatment	1124580	10	112458	F (10, 140) = 47.34	P<0.0001	12	88.11	55.85 to 120.4	Yes	****	<0.0001	234	145.9	88.11	9.597	8	8	9.182	13.99
	15	Yes	<0.000001	304.9	178.7	126.2	12.3	10.26	13.99	<0.000001		Time	8248821	10	824882	F (1.633, 22.86) = 347.3	P<0.0001	15	126.2	84.84 to 167.5	Yes	****	<0.0001	304.9	178.7	126.2	12.3	8	8	10.26	13.99
	17	Yes	<0.000001	403.2	205.3	197.9	15.75	12.56	13.9	<0.000001		Treatment	1068798	1	1068798	F (1, 14) = 117.5	P<0.0001	17	197.9	144.9 to 251.0	Yes	****	<0.0001	403.2	205.3	197.9	15.75	8	8	12.56	13.9
	19	Yes	1e-06	571.9	259	312.9	32.75	9.557	10.87	<0.000001		Subject	127299	14	9093	F (14, 140) = 3.828	P<0.0001	19	312.9	196.8 to 429.1	Yes	****	<0.0001	571.9	259	312.9	32.75	8	8	9.557	10.87
	22	Yes	<0.000001	772.8	385.4	387.5	36.57	10.6	13.09	<0.000001		Residual	332548	140	2375			22	387.5	262.9 to 512.0	Yes	****	<0.0001	772.8	385.4	387.5	36.57	8	8	10.6	13.09
	24	Yes	1.8e-05	1053	570.7	481.9	71.5	6.74	12.29	6e-06								24	481.9	235.3 to 728.6	Yes	***	0.0002	1053	570.7	481.9	71.5	8	8	6.74	12.29
	oHSV vs. oHSV+OSI-906											oHSV (n=7) - oHSV+OSI-906 (n=9)
	Days	Discovery?	P value	Mean of oHSV (n=7)	Mean of oHSV +OSI (n=9)	Difference	SE of difference	t ratio	df	q value		Source of Variation	% of total variation	P value	P value summary	Significant?	Geisser-Greenhouse's epsilon	Šídák's multiple comparisons test	Mean Diff.	95.00% CI of diff.	Below threshold?	Summary	Adjusted P Value	Mean 1	Mean 2	Mean Diff.	SE of diff.	N1	N2	t	DF
	1	No	0.053235	119.3	105.2	14.08	6.454	2.182	10.34	0.021507		Time x Treatment	8.251	<0.0001	****	Yes		1	14.08	-9.108 to 37.27	No	ns	0.4521	119.3	105.2	14.08	6.454	7	8	2.182	10.34
	3	No	0.260418	124.7	112.8	11.96	10.11	1.183	11.56	0.095644		Time	77.79	<0.0001	****	Yes	0.1282	3	11.96	-23.38 to 47.29	No	ns	0.9638	124.7	112.8	11.96	10.11	7	8	1.183	11.56
	5	Yes	0.011131	141.3	109.9	31.41	9.985	3.145	9.46	0.005621		Treatment	7.593	0.0002	***	Yes		5	31.41	-5.354 to 68.17	No	ns	0.1159	141.3	109.9	31.41	9.985	7	8	3.145	9.46
	8	Yes	0.021635	160.3	122	38.26	13.72	2.788	8.769	0.009712		Subject	3.794	<0.0001	****	Yes		8	38.26	-13.42 to 89.94	No	ns	0.2138	160.3	122	38.26	13.72	7	8	2.788	8.769
	10	Yes	0.000564	183.5	136	47.44	10.27	4.618	12.23	0.001227		ANOVA table	SS	DF	MS	F (DFn, DFd)	P value	10	47.44	11.97 to 82.91	Yes	**	0.0062	183.5	136	47.44	10.27	7	8	4.618	12.23
	12	Yes	0.000654	212.2	145.9	66.35	13.54	4.899	9.842	0.001227		Time x Treatment	730837	10	73084	F (10, 130) = 19.30	P<0.0001	12	66.35	17.04 to 115.7	Yes	**	0.0072	212.2	145.9	66.35	13.54	7	8	4.899	9.842
	15	Yes	0.003618	262.6	178.7	83.92	21.1	3.977	8.49	0.002436		Time	6889897	10	688990	F (1.282, 16.66) = 181.9	P<0.0001	15	83.92	3.617 to 164.2	Yes	*	0.0391	262.6	178.7	83.92	21.1	7	8	3.977	8.49
	17	Yes	0.001172	339.5	205.3	134.2	27.99	4.796	8.441	0.001227		Treatment	672583	1	672583	F (1, 13) = 26.02	P=0.0002	17	134.2	27.51 to 241.0	Yes	*	0.0128	339.5	205.3	134.2	27.99	7	8	4.796	8.441
	19	Yes	0.004553	482	259	223	54.63	4.082	7.089	0.002627		Subject	336011	13	25847	F (13, 130) = 6.824	P<0.0001	19	223	0.9291 to 445.1	Yes	*	0.049	482	259	223	54.63	7	8	4.082	7.089
	22	Yes	0.002914	713.4	385.4	328	74.27	4.417	7.175	0.002355		Residual	492378	130	3788			22	328	27.56 to 628.5	Yes	*	0.0316	713.4	385.4	328	74.27	7	8	4.417	7.175
	24	Yes	0.001215	999.8	570.7	429	91.41	4.694	8.764	0.001227								24	429	84.69 to 773.4	Yes	*	0.0133	999.8	570.7	429	91.41	7	8	4.694	8.764

## Sheet: Figure 3E
	GBM12 Implanted Intracranially in NSG mice								GBM28 Implanted Intracranially in NSG mice
	Survival Curve Comparison (Composite Analysis)		Number at Risk						Survival Curve Comparison (Composite Analysis)		Number at Risk
	Log-rank (Mantel-Cox) test (conservative)		Days	PBS (n=9)	PPP (n=9)	oHSV (n=9)	oHSV+PPP (n=9)		Log-rank (Mantel-Cox) test (conservative)		Days	PBS (n=10)	PPP (n=10)	oHSV (n=10)	oHSV+PPP (n=9)
	Chi square	10.7	0	9	9	9	9		Chi square	10.13	0	10	10	10	9
	df	3	16		9				df	3	49		10	10
	P value	0.0135	22	9	8	9	9		P value	0.0175	51			9
	P value summary	*	24			8			P value summary	*	52	10
	Are the survival curves sig different	Yes	25	6	7	7			Are the survival curves sig different	Yes	53	8	9
	Logrank test for trend (conservative)		26	5	5	6			Logrank test for trend (conservative)		54		7	8	9
	Chi square	10.38	27	1					Chi square	10.05	57	6	6
	df	1	29		2	4			df	1	58			7
	P value	0.0013	33		1		8		P value	0.0015	61	3	5		8
	P value summary	**	36				7		P value summary	**	62	2		6
	Are the survival curves sig different	Yes	40			3			Are the survival curves sig different	Yes	66			4	7
	Gehan-Breslow-Wilcoxon test		41			1	6		Gehan-Breslow-Wilcoxon test		67		3
	Chi square	12.56	44				4		Chi square	10.04	69			3
	df	3	46				2		df	3	71	1
	P value	0.0057	47				1		P value	0.0182	73			2
	P value summary	**	Median Survival (days)						P value summary	*	74		1
	Are the survival curves sig different	Yes		26	26	26	41		Are the survival curves sig different	Yes	76				6
	Survival Curve Comparison Between Groups										79				3
	PBS (A) vs oHSV+PPP (B)										81			1
	Log-rank (Mantel-Cox) test		Hazard Ratio (Mantel-Haenszel)			A/B	B/A				84				2
	Chi square	12.9	Ratio (and its reciprocal)			13.76	0.07267				89				1
	df	1	95% CI of ratio			3.291 to 57.53	0.01738 to 0.3038				Median Survival (days)
	P value	0.0003	Hazard Ratio (logrank)			A/B	B/A					57	59	62	76
	P value summary	***	Ratio (and its reciprocal)			3.414	0.2929		Survival Curve Comparison Between Groups
	Are the survival curves sig different	Yes	95% CI of ratio			1.132 to 10.29	0.09716 to 0.8832		PBS (A) vs oHSV+PPP (B)
	Gehan-Breslow-Wilcoxon test		Median survival Comparison						Log-rank (Mantel-Cox) test		Hazard Ratio (Mantel-Haenszel)			A/B	B/A
	Chi square	9.837	Ratio (and its reciprocal)		0.6341	1.577			Chi square	10.9	Ratio (and its reciprocal)			7.872	0.127
	df	1	95% CI of ratio		0.2517 to 1.598	0.6260 to 3.973			df	1	95% CI of ratio			2.313 to 26.79	0.03733 to 0.4323
	P value	0.0017							P value	0.001	Hazard Ratio (logrank)			A/B	B/A
	P value summary	**							P value summary	***	Ratio (and its reciprocal)			3.366	0.2971
	Are the survival curves sig different	Yes							Are the survival curves sig different	Yes	95% CI of ratio			1.189 to 9.533	0.1049 to 0.8413
	PBS (A) vs oHSV (B)								Gehan-Breslow-Wilcoxon test		Median survival Comparison
	Log-rank (Mantel-Cox) test		Hazard Ratio (Mantel-Haenszel)			A/B	B/A		Chi square	9.148	Ratio (and its reciprocal)		0.75	1.333
	Chi square	3.05	Ratio (and its reciprocal)			3.067	0.326		df	1	95% CI of ratio		0.3048 to 1.846	0.5418 to 3.281
	df	1	95% CI of ratio			0.8719 to 10.79	0.09267 to 1.147		P value	0.0025
	P value	0.0808	Hazard Ratio (logrank)			A/B	B/A		P value summary	**
	P value summary	ns	Ratio (and its reciprocal)			1.867	0.5357		Are the survival curves sig different	Yes
	Are the survival curves sig different?	No	95% CI of ratio			0.7081 to 4.921	0.2032 to 1.412		PBS (A) vs oHSV (B)
	Gehan-Breslow-Wilcoxon test		Median survival Comparison						Log-rank (Mantel-Cox) test		Hazard Ratio (Mantel-Haenszel)			A/B	B/A
	Chi square	1.978	Ratio (and its reciprocal)		1	1			Chi square	2.246	Ratio (and its reciprocal)			2.179	0.4589
	df	1	95% CI of ratio		0.3969 to 2.519	0.3969 to 2.519			df	1	95% CI of ratio			0.7867 to 6.037	0.1657 to 1.271
	P value	0.1596							P value	0.134	Hazard Ratio (logrank)			A/B	B/A
	P value summary	ns							P value summary	ns	Ratio (and its reciprocal)			1.81	0.5525
	Are the survival curves sig different?	No							Are the survival curves sig different?	No	95% CI of ratio			0.7247 to 4.521	0.2212 to 1.380
	PBS (A) vs PPP (B)								Gehan-Breslow-Wilcoxon test		Median survival Comparison
	Log-rank (Mantel-Cox) test		Hazard Ratio (Mantel-Haenszel)			A/B	B/A		Chi square	1.491	Ratio (and its reciprocal)		0.9194	1.088
	Chi square	0.5453	Ratio (and its reciprocal)			1.597	0.6261		df	1	95% CI of ratio		0.3827 to 2.209	0.4527 to 2.613
	df	1	95% CI of ratio			0.4609 to 5.536	0.1806 to 2.170		P value	0.2221
	P value	0.4603	Hazard Ratio (logrank)			A/B	B/A		P value summary	ns
	P value summary	ns	Ratio (and its reciprocal)			1.297	0.7709		Are the survival curves sig different?	No
	Are the survival curves sig different?	No	95% CI of ratio			0.5109 to 3.294	0.3036 to 1.957		PBS (A) vs PPP (B)
	Gehan-Breslow-Wilcoxon test		Median survival Comparison						Log-rank (Mantel-Cox) test		Hazard Ratio (Mantel-Haenszel)			A/B	B/A
	Chi square	0.1332	Ratio (and its reciprocal)		1	1			Chi square	0.6647	Ratio (and its reciprocal)			1.524	0.6563
	df	1	95% CI of ratio		0.3969 to 2.519	0.3969 to 2.519			df	1	95% CI of ratio			0.5536 to 4.193	0.2385 to 1.806
	P value	0.7151							P value	0.4149	Hazard Ratio (logrank)			A/B	B/A
	P value summary	ns							P value summary	ns	Ratio (and its reciprocal)			1.375	0.7273
	Are the survival curves sig different?	No							Are the survival curves sig different?	No	95% CI of ratio			0.5659 to 3.340	0.2994 to 1.767
	PPP (A) vs oHSV+PPP (B)								Gehan-Breslow-Wilcoxon test		Median survival Comparison
	Log-rank (Mantel-Cox) test		Hazard Ratio (Mantel-Haenszel)			A/B	B/A		Chi square	0.4165	Ratio (and its reciprocal)		0.9661	1.035
	Chi square	12.12	Ratio (and its reciprocal)			11.02	0.09072		df	1	95% CI of ratio		0.4021 to 2.321	0.4308 to 2.487
	df	1	95% CI of ratio			2.854 to 42.58	0.02349 to 0.3504		P value	0.5187
	P value	0.0005	Hazard Ratio (logrank)			A/B	B/A		P value summary	ns
	P value summary	***	Ratio (and its reciprocal)			3.556	0.2812		Are the survival curves sig different?	No
	Are the survival curves sig different?	Yes	95% CI of ratio			1.165 to 10.86	0.09210 to 0.8585		PPP (A) vs oHSV+PPP (B)
	Gehan-Breslow-Wilcoxon test		Median survival Comparison						Log-rank (Mantel-Cox) test		Hazard Ratio (Mantel-Haenszel)			A/B	B/A
	Chi square	9.389	Ratio (and its reciprocal)		0.6341	1.577			Chi square	8.796	Ratio (and its reciprocal)			6.005	0.1665
	df	1	95% CI of ratio		0.2517 to 1.598	0.6260 to 3.973			df	1	95% CI of ratio			1.837 to 19.63	0.05093 to 0.5445
	P value	0.0022							P value	0.003	Hazard Ratio (logrank)			A/B	B/A
	P value summary	**							P value summary	**	Ratio (and its reciprocal)			3.034	0.3296
	Are the survival curves sig different?	Yes							Are the survival curves sig different?	Yes	95% CI of ratio			1.099 to 8.372	0.1194 to 0.9097
	oHSV (A) vs oHSV+PPP (B)								Gehan-Breslow-Wilcoxon test		Median survival Comparison
	Log-rank (Mantel-Cox) test		Hazard Ratio (Mantel-Haenszel)			A/B	B/A		Chi square	7.005	Ratio (and its reciprocal)		0.7763	1.288
	Chi square	6.489	Ratio (and its reciprocal)			4.732	0.2113		df	1	95% CI of ratio		0.3155 to 1.910	0.5234 to 3.170
	df	1	95% CI of ratio			1.431 to 15.65	0.06391 to 0.6988		P value	0.0081
	P value	0.0109	Hazard Ratio (logrank)			A/B	B/A		P value summary	**
	P value summary	*	Ratio (and its reciprocal)			2.73	0.3662		Are the survival curves sig different?	Yes
	Are the survival curves sig different?	Yes	95% CI of ratio			0.9623 to 7.748	0.1291 to 1.039		oHSV (A) vs oHSV+PPP (B)
	Gehan-Breslow-Wilcoxon test		Median survival Comparison						Log-rank (Mantel-Cox) test		Hazard Ratio (Mantel-Haenszel)			A/B	B/A
	Chi square	5.191	Ratio (and its reciprocal)		0.6341	1.577			Chi square	2.246	Ratio (and its reciprocal)			2.179	0.4589
	df	1	95% CI of ratio		0.2517 to 1.598	0.6260 to 3.973			df	1	95% CI of ratio			0.7867 to 6.037	0.1657 to 1.271
	P value	0.0227							P value	0.134	Hazard Ratio (logrank)			A/B	B/A
	P value summary	*							P value summary	ns	Ratio (and its reciprocal)			1.81	0.5525
	Are the survival curves sig different?	Yes							Are the survival curves sig different?	No	95% CI of ratio			0.7247 to 4.521	0.2212 to 1.380
									Gehan-Breslow-Wilcoxon test		Median survival Comparison
									Chi square	1.491	Ratio (and its reciprocal)		0.9194	1.088
									df	1	95% CI of ratio		0.3827 to 2.209	0.4527 to 2.613
									P value	0.2221
									P value summary	ns
									Are the survival curves sig different?	No

## Sheet: Figure 4A
		Figure 4A
		Unpaired Student's T-Test with Welch Correction and Two-stage step-up (Benjamini, Krieger, and Yekutieli) False Discovery Test (Desired FDR (Q) = 1%)
		NT vs. oHSV+RTx
		Cell	Discovery?	P value	Mean of NT (n=4)	Mean of oHSV+RTx (n=4)	Difference	SE of difference	t ratio	df	q value
		GBM6	Yes	0.000122	0	41.83	-41.83	2.084	20.07	3.386	0.000123
		MDA468	Yes	4.2e-05	0	55.61	-55.61	3.469	16.03	4.45	4.2e-05
		MDA231	Yes	0.001069	0	28.45	-28.45	2.3	12.37	3.039	0.00108
		GBM43	Yes	0.000134	0	38.85	-38.85	2.713	14.32	4.018	0.000136
		GBM28	Yes	0.002686	0	44.68	-44.68	4.597	9.72	2.894	0.002712
		U251T3	Yes	0.003946	0	41.77	-41.77	6.254	6.68	3.552	0.003986
		NT vs. RTx
		Days	Discovery?	P value	Mean of NT (n=4)	Mean of RTx (n=4)	Difference	SE of difference	t ratio	df	q value
		GBM6	No	0.048199	0	-8.117	8.117	3.024	2.684	4.539	0.048681
		MDA468	Yes	0.002904	0	21.18	-21.18	3.395	6.238	4.179	0.002933
		MDA231	No	0.522584	0	2.188	-2.188	3.12	0.7013	3.911	0.52781
		GBM43	Yes	0.002134	0	17.53	-17.53	3.395	5.164	5.955	0.002156
		GBM28	No	0.102431	0	10.94	-10.94	4.964	2.204	3.476	0.103456
		U251T3	No	0.03982	0	20.2	-20.2	5.805	3.48	3.011	0.040219
		NT vs. oHSV
		Days	Discovery?	P value	Mean of NT (n=4)	Mean of oHSV (n=4)	Difference	SE of difference	t ratio	df	q value
		GBM6	No	0.024569	0	7.538	-7.538	2.383	3.163	5.065	0.024815
		MDA468	Yes	0.000876	0	31.95	-31.95	3.277	9.75	3.723	0.000885
		MDA231	Yes	0.003962	0	17.45	-17.45	2.354	7.413	3.222	0.004001
		GBM43	No	0.010879	0	16.67	-16.67	4.37	3.816	5.366	0.010987
		GBM28	Yes	0.007494	0	31.65	-31.65	4.554	6.948	2.815	0.007569
		U251T3	No	0.018243	0	26.53	-26.53	5.946	4.462	3.202	0.018425
		RTx vs. oHSV+RTx
		Days	Discovery?	P value	Mean of RTx (n=4)	Mean of oHSV+RTx (n=4)	Difference	SE of difference	t ratio	df	q value
		GBM6	Yes	0.001281	-8.117	41.83	-49.94	2.318	21.55	2.216	0.001294
		MDA468	Yes	4e-06	21.18	55.61	-34.43	2.104	16.37	5.922	4e-06
		MDA231	Yes	0.002791	2.188	28.45	-26.26	2.6	10.1	2.793	0.002819
		GBM43	Yes	0.000866	17.53	38.85	-21.32	2.521	8.454	4.197	0.000875
		GBM28	Yes	0.000889	10.94	44.68	-33.74	3.402	9.919	3.664	0.000898
		U251T3	No	0.009997	20.2	41.77	-21.57	4.449	4.848	3.722	0.010097
		oHSV vs. oHSV+RTx
		Days	Discovery?	P value	Mean of oHSV (n=4)	Mean of oHSV +RTx (n=4)	Difference	SE of difference	t ratio	df	q value
		GBM6	Yes	2.4e-05	7.538	41.83	-34.29	1.38	24.85	3.796	2.4e-05
		MDA468	Yes	3.9e-05	31.95	55.61	-23.66	1.907	12.41	5.324	4e-05
		MDA231	Yes	0.002445	17.45	28.45	-11	1.602	6.862	3.962	0.00247
		GBM43	Yes	0.006033	16.67	38.85	-22.17	3.732	5.942	3.508	0.006093
		GBM28	Yes	0.009325	31.65	44.68	-13.04	2.77	4.706	3.99	0.009419
		U251T3	No	0.031579	26.53	41.77	-15.24	4.632	3.291	3.881	0.031895
		RTx vs. oHSV
		Days	Discovery?	P value	Mean of RTx (n=4)	Mean of oHSV (n=4)	Difference	SE of difference	t ratio	df	q value
		GBM6	Yes	0.007146	7.538	-8.117	15.65	2.59	6.045	3.256	0.007218
		MDA468	Yes	0.001121	31.95	21.18	10.77	1.769	6.089	5.642	0.001132
		MDA231	No	0.010903	17.45	2.188	15.26	2.648	5.764	2.946	0.011012
		GBM43	No	0.847672	16.67	17.53	-0.8595	4.253	0.2021	5.106	0.856148
		GBM28	Yes	0.005008	31.65	10.94	20.71	3.343	6.193	3.567	0.005058
		U251T3	No	0.189872	26.53	20.2	6.331	4.005	1.581	3.958	0.19177

## Sheet: Figure 4B
	Figure 4B
	Unpaired Student's T-Test with Welch Correction and Two-stage step-up (Benjamini, Krieger, and Yekutieli) False Discovery Test (Desired FDR (Q) = 1%)
	NT vs. oHSV
	Cell	Discovery?	P value	Mean of NT (n=7)	Mean of oHSV+RTx (n=4)	Difference	SE of difference	t ratio	df	q value
	GBM6	Yes	0.005712	1	1.342	-0.3419	0.0288	11.87	2.114	0.005769
	MDA468	Yes	0.000421	1	6.517	-5.517	0.1323	41.7	2.102	0.000425
	NT vs. RTx
	Days	Discovery?	P value	Mean of NT (n=4)	Mean of RTx (n=4)	Difference	SE of difference	t ratio	df	q value
	GBM6	Yes	0.008866	1	1.339	-0.3387	0.05815	5.824	3.141	0.008954
	MDA468	Yes	0.001502	1	3.639	-2.639	0.1193	22.11	2.126	0.001517
	NT vs. oHSV + RTx
	Days	Discovery?	P value	Mean of NT (n=4)	Mean of oHSV (n=4)	Difference	SE of difference	t ratio	df	q value
	GBM6	Yes	0.000182	1	1.834	-0.8339	0.03126	26.67	2.812	0.000183
	MDA468	Yes	0.000101	1	10.27	-9.271	0.118	78.59	2.129	0.000102
	RTx vs. oHSV+RTx
	Days	Discovery?	P value	Mean of RTx (n=4)	Mean of oHSV+RTx (n=4)	Difference	SE of difference	t ratio	df	q value
	GBM6	Yes	0.007268	1.339	1.834	-0.4952	0.0524	9.451	2.264	0.007341
	MDA468	Yes	2e-06	3.639	10.27	-6.632	0.1652	40.14	3.999	2e-06
	oHSV vs. oHSV+RTx
	Days	Discovery?	P value	Mean of oHSV (n=4)	Mean of oHSV+RTx (n=4)	Difference	SE of difference	t ratio	df	q value
	GBM6	Yes	0.000179	1.342	1.834	-0.492	0.01393	35.33	2.528	0.000181
	MDA468	Yes	3.1e-05	6.517	10.27	-3.754	0.1748	21.48	3.946	3.1e-05
	RTx vs. oHSV
	Days	Discovery?	P value	Mean of RTx (n=4)	Mean of oHSV (n=4)	Difference	SE of difference	t ratio	df	q value
	GBM6	No	0.955629	1.342	1.339	0.003195	0.05097	0.06269	2.036	0.965185
	MDA468	Yes	8.8e-05	6.517	3.639	2.878	0.1757	16.38	3.956	8.9e-05

## Sheet: Figure 4D
	GBM12 Implanted Intracranially in NSG mice
	Survival Curve Comparison (Composite Analysis)		Number at Risk
	Log-rank (Mantel-Cox) test (conservative)		Days	PBS (n=6)	RTx (n=10)	oHSV (n=10)	oHSV+RTx (n=10)
	Chi square	50.25	0	6	10	10	10
	df	3	23	6
	P value	<0.0001	24	4	10
	P value summary	****	25	3	9	10
	Are the survival curves sig different	Yes	26		7
	Logrank test for trend (conservative)		27		4	9
	Chi square	45.41	28		2
	df	1	29			8
	P value	<0.0001	30			6
	P value summary	****	31		1
	Are the survival curves sig different	Yes	32			5	10
	Gehan-Breslow-Wilcoxon test		33			3
	Chi square	42.04	34			2	8
	df	3	39				7
	P value	<0.0001	41				5
	P value summary	****	42				4
	Are the survival curves sig different	Yes	46				2
			Median Survival (days)
				24.5	26	31	40
	Survival Curve Comparison Between Groups
	PBS (A) vs oHSV+RTx (B)
	Log-rank (Mantel-Cox) test		Hazard Ratio (Mantel-Haenszel)			A/B	B/A
	Chi square	16.81	Ratio (and its reciprocal)			51.21	0.01953
	df	1	95% CI of ratio			7.804 to 336.1	0.002976 to 0.1281
	P value	<0.0001	Hazard Ratio (logrank)			A/B	B/A
	P value summary	****	Ratio (and its reciprocal)			4.955	0.2018
	Are the survival curves sig different	Yes	95% CI of ratio			1.022 to 24.03	0.04162 to 0.9784
	Gehan-Breslow-Wilcoxon test		Median survival Comparison
	Chi square	15.86	Ratio (and its reciprocal)			0.6125	1.633
	df	1	95% CI of ratio			0.2226 to 1.685	0.5934 to 4.492
	P value	<0.0001
	P value summary	****
	Are the survival curves sig different	Yes
	PBS (A) vs oHSV (B)
	Log-rank (Mantel-Cox) test		Hazard Ratio (Mantel-Haenszel)			A/B	B/A
	Chi square	13.91	Ratio (and its reciprocal)			31.25	0.032
	df	1	95% CI of ratio			5.119 to 190.7	0.005244 to 0.1953
	P value	0.0002	Hazard Ratio (logrank)			A/B	B/A
	P value summary	***	Ratio (and its reciprocal)			4.301	0.2325
	Are the survival curves sig different?	Yes	95% CI of ratio			0.9646 to 19.18	0.05214 to 1.037
	Gehan-Breslow-Wilcoxon test		Median survival Comparison
	Chi square	13.43	Ratio (and its reciprocal)			0.7903	1.265
	df	1	95% CI of ratio			0.2872 to 2.175	0.4599 to 3.481
	P value	0.0002
	P value summary	***
	Are the survival curves sig different?	Yes
	PBS (A) vs RTx (B)
	Log-rank (Mantel-Cox) test		Hazard Ratio (Mantel-Haenszel)			A/B	B/A
	Chi square	8.332	Ratio (and its reciprocal)			11.36	0.08803
	df	1	95% CI of ratio			2.182 to 59.16	0.01690 to 0.4584
	P value	0.0039	Hazard Ratio (logrank)			A/B	B/A
	P value summary	**	Ratio (and its reciprocal)			3.133	0.3191
	Are the survival curves sig different?	Yes	95% CI of ratio			0.8252 to 11.90	0.08406 to 1.212
	Gehan-Breslow-Wilcoxon test		Median survival Comparison
	Chi square	8.129	Ratio (and its reciprocal)			0.9423	1.061
	df	1	95% CI of ratio			0.3425 to 2.593	0.3857 to 2.920
	P value	0.0044
	P value summary	**
	Are the survival curves sig different?	Yes
	RTx (A) vs oHSV+RTx (B)
	Log-rank (Mantel-Cox) test		Hazard Ratio (Mantel-Haenszel)			A/B	B/A
	Chi square	21.53	Ratio (and its reciprocal)			27.63	0.0362
	df	1	95% CI of ratio			6.801 to 112.2	0.008910 to 0.1470
	P value	<0.0001	Hazard Ratio (logrank)			A/B	B/A
	P value summary	****	Ratio (and its reciprocal)			4.695	0.213
	Are the survival curves sig different?	Yes	95% CI of ratio			1.484 to 14.86	0.06731 to 0.6739
	Gehan-Breslow-Wilcoxon test		Median survival Comparison
	Chi square	17.93	Ratio (and its reciprocal)			0.65	1.538
	df	1	95% CI of ratio			0.2705 to 1.562	0.6403 to 3.696
	P value	<0.0001
	P value summary	****
	Are the survival curves sig different?	Yes
	oHSV (A) vs oHSV+RTx (B)
	Log-rank (Mantel-Cox) test		Hazard Ratio (Mantel-Haenszel)			A/B	B/A
	Chi square	12.51	Ratio (and its reciprocal)			9.496	0.1053
	df	1	95% CI of ratio			2.727 to 33.06	0.03025 to 0.3666
	P value	0.0004	Hazard Ratio (logrank)			A/B	B/A
	P value summary	***	Ratio (and its reciprocal)			3.501	0.2856
	Are the survival curves sig different?	Yes	95% CI of ratio			1.220 to 10.05	0.09953 to 0.8198
	Gehan-Breslow-Wilcoxon test		Median survival Comparison
	Chi square	10.86	Ratio (and its reciprocal)			0.775	1.29
	df	1	95% CI of ratio			0.3226 to 1.862	0.5371 to 3.100
	P value	0.001
	P value summary	***
	Are the survival curves sig different?	Yes

## Sheet: Figure 5C
	Figure 5C
	Unpaired Student's T-Test with Welch Correction and Two-stage step-up (Benjamini, Krieger, and Yekutieli) False Discovery Test (Desired FDR (Q) = 1%)
	oHSV (A) vs. oHSV + 5uM OSI-906 (B)
	RTx Dose	Discovery?	P value	Mean of A (n=3)	Mean of B (n=3)	Difference	SE of difference	t ratio	df	q value
	0 Gy	Yes	0.004181	2.293	3.517	-1.223	0.2081	5.88	4	0.004223
	2 Gy	Yes	0.003163	2.5	0.5	2	0.3153	6.344	4	0.004223
	5 Gy	Yes	0.002237	1.903	0.6067	1.297	0.1862	6.962	4	0.004223
	DMSO (A) vs. oHSV + 5uM OSI-906 (B)
	RTx Dose	Discovery?	P value	Mean of A (n=3)	Mean of B (n=3)	Difference	SE of difference	t ratio	df	q value
	0 Gy	Yes	0.0015	2.573	3.517	-0.9433	0.1132	8.331	3.747	0.000758
	2 Gy	Yes	0.000405	2.597	0.5	2.097	0.1767	11.87	3.764	0.000409
	5 Gy	No	0.064151	2.213	0.6067	1.607	0.4933	3.257	2.413	0.021598
	5uM OSI-906 (A) vs. oHSV + 5uM OSI-906 (B)
	RTx Dose	Discovery?	P value	Mean of A (n=3)	Mean of B (n=3)	Difference	SE of difference	t ratio	df	q value
	0 Gy	No	0.426025	3.96	3.517	0.4433	0.371	1.195	1.126	0.430286
	2 Gy	No	0.017107	1.17	0.5	0.67	0.114	5.876	2.439	0.040472
	5 Gy	No	0.026714	1.8	0.6067	1.193	0.3054	3.908	3.184	0.040472

[truncated: 3 more sheets: Figure 5G, Figure 5I, Figure 5J]
