# Supplementary material for: Overcoming IGF1R-Mediated Resistance to Oncolytic HSV1 and Radiotherapy via Triple Combination Therapy
Source: Research Square preprint supplement (doi:10.21203/rs.3.rs-8117591/v1), 2025-12-15
Supplement: Supplementary file 3 [file c05640974e26fab011c6243d.docx]

**Overcoming IGF1R-Mediated Resistance to Oncolytic HSV1 and Radiotherapy via Triple Combination Therapy**

Alexandra A. Miller1,2*, Min-Hye Noh1*, Jin Muk Kang1,3, Jiyeon Kim1, Amanda S. Kouaho1, Grace Nguyen1,4, Minxin Huang1,5, Stephanie M. Bean1, Sunil Krishnan1,2, Zhongming Zhao2,6, E. Antonio Chiocca7, Tae Jin Lee1,2#, and Ji Young Yoo1,2#

1Department of Neurosurgery, McGovern Medical School, The University of Texas Health Science Center at Houston, Houston, TX, 77030, USA. 2The University of Texas MD Anderson Cancer Center UTHealth Houston Graduate School of Biomedical Sciences, Houston, TX 77225, USA. 3Department of Pediatric Hematology & Oncology, University Hospitals Cleveland Medical Center, Cleveland, OH, 44106, USA. 4Southwestern Graduate School of Biomedical Sciences, The University of Texas, Dallas, TX, 75235, USA. 5Molecular and Cellular Pharmacology Program, Stony Brook University Graduate School, Stony Brook, NY, 11794, USA 6Center for Precision Health, McWilliams School of Biomedical Informatics, The University of Texas Health Science Center at Houston, Houston, TX 77030, USA. 7Department of Neurosurgery, Mass General Brigham and Harvard Medical School, Boston, MA, 02115, USA.

**Supplementary Western Blot Proofs.**

Original image of Western blotting analysis. Sample orders are given from left to right.


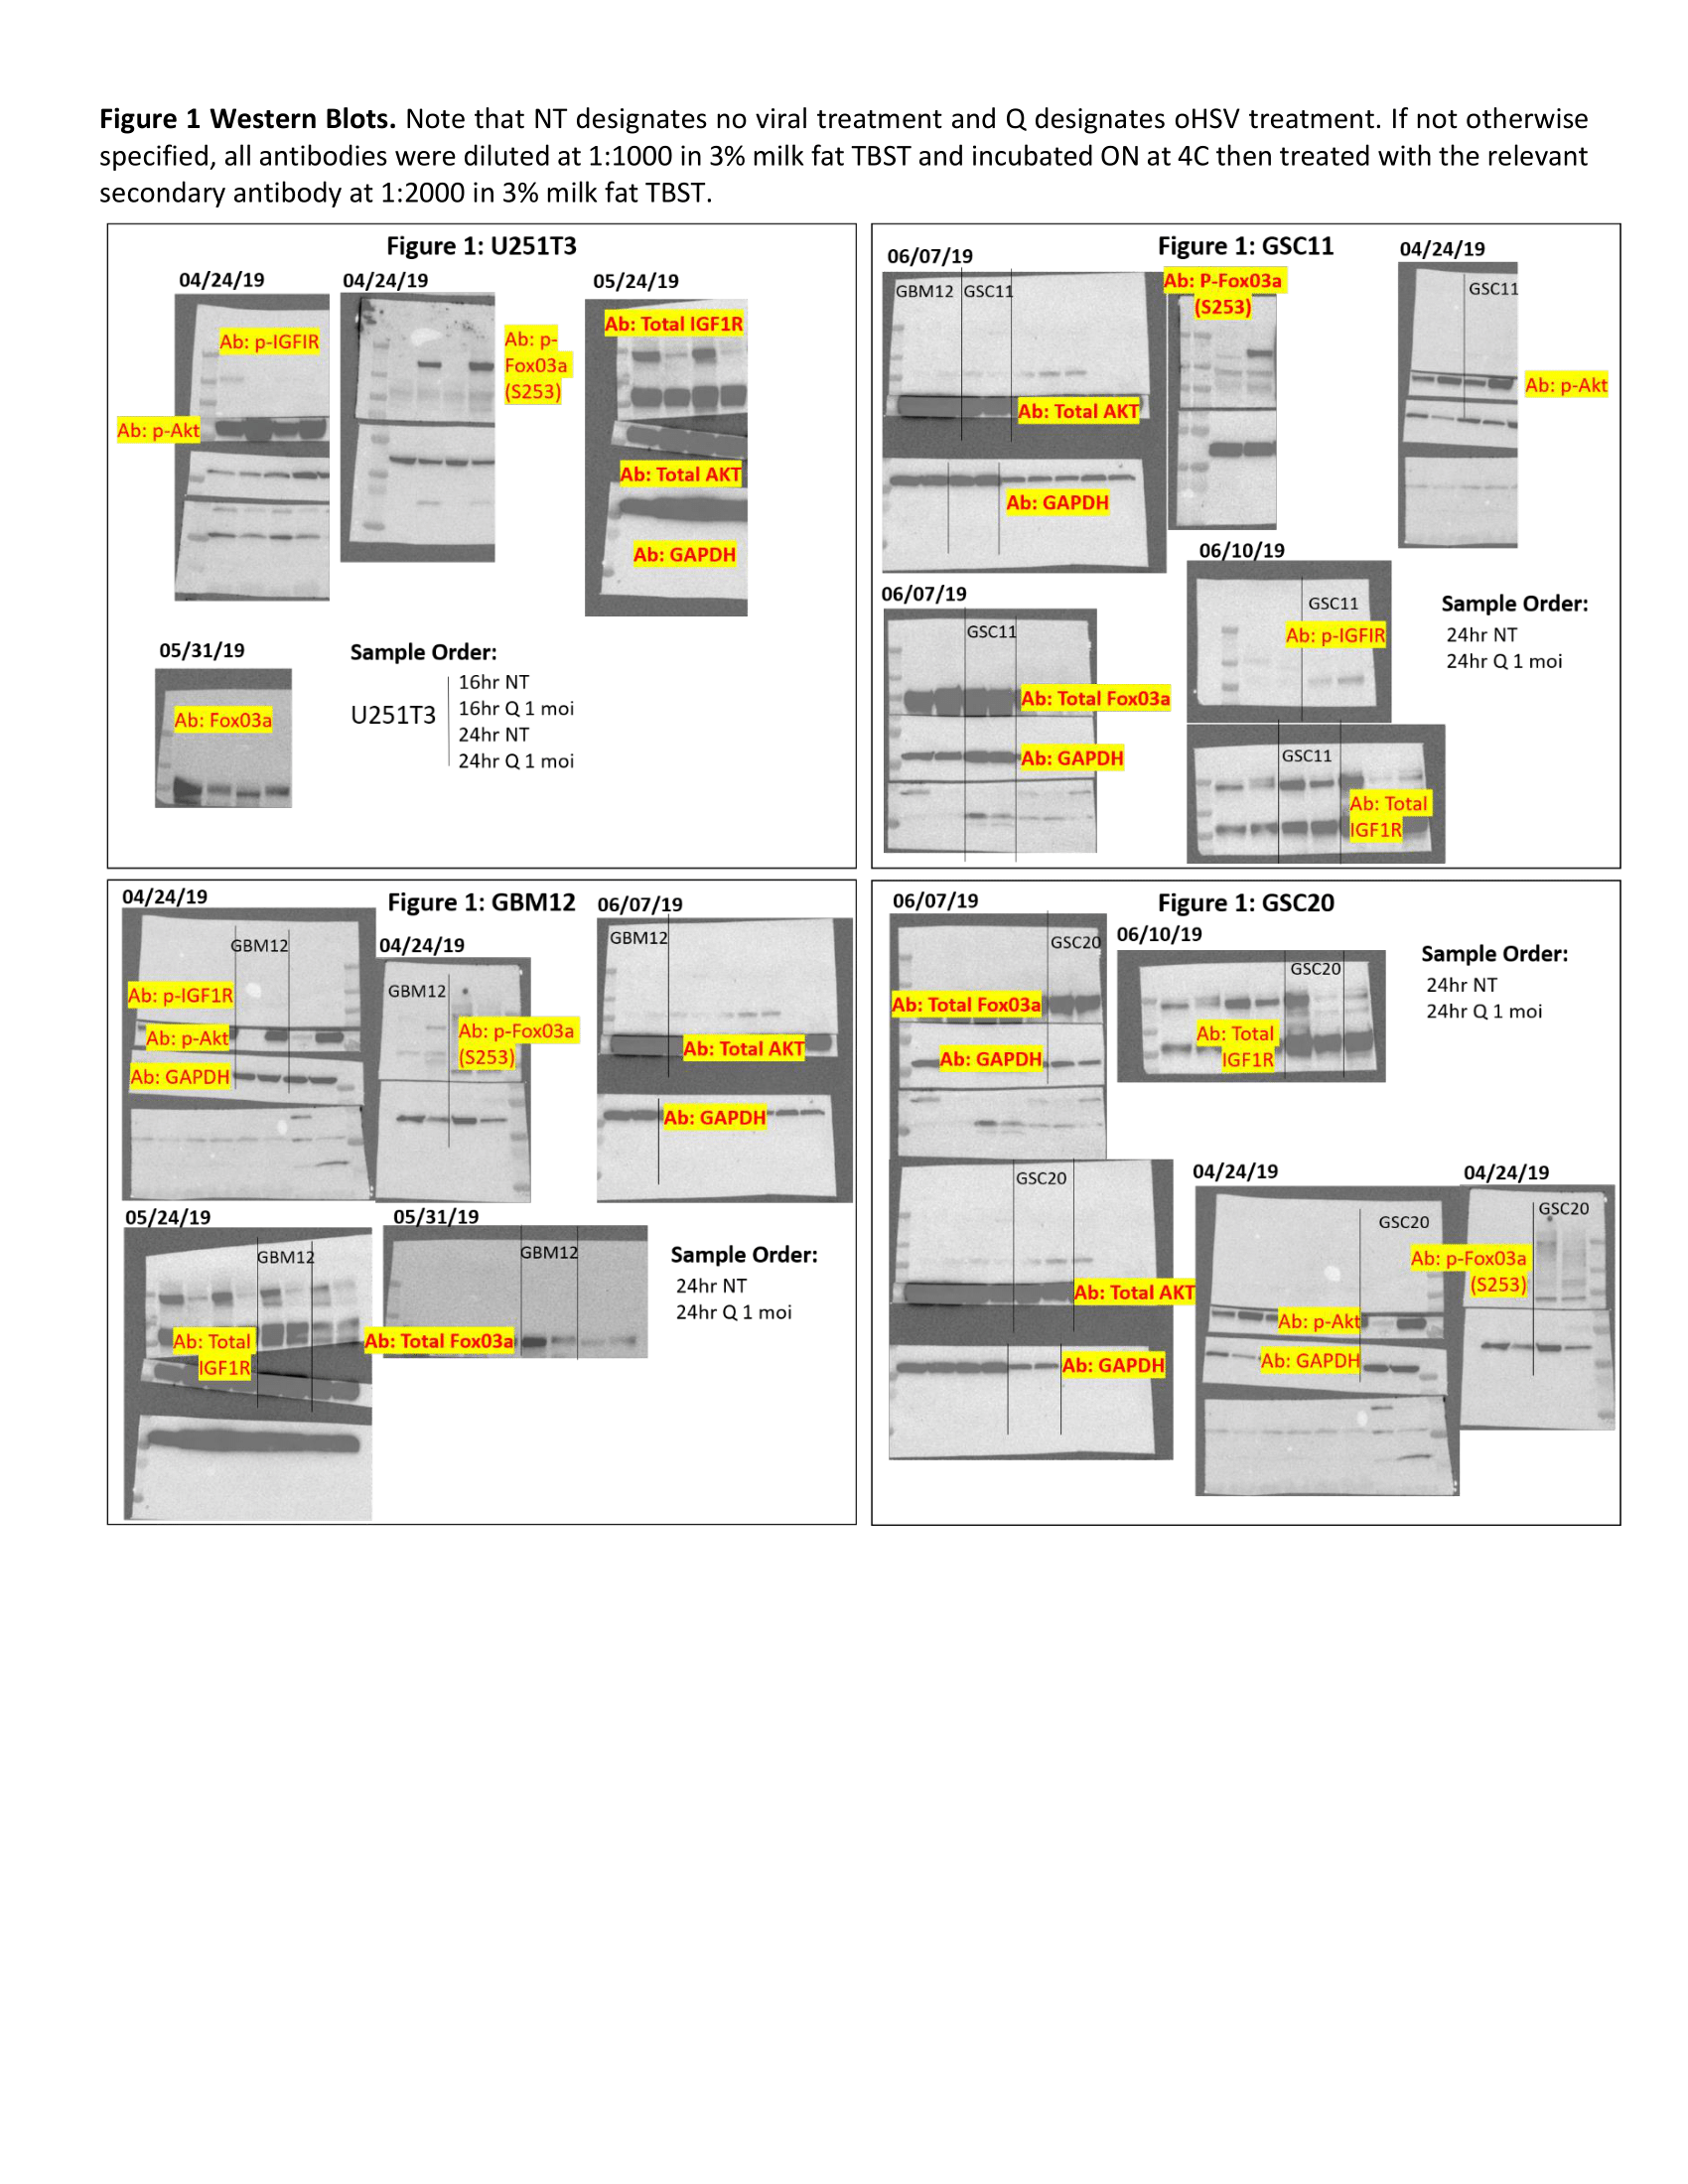


**Figure 2: GBM12**

**Figure 2: GSC20**

**Figure 2: GSC11**

**Figure 2: U251T3**


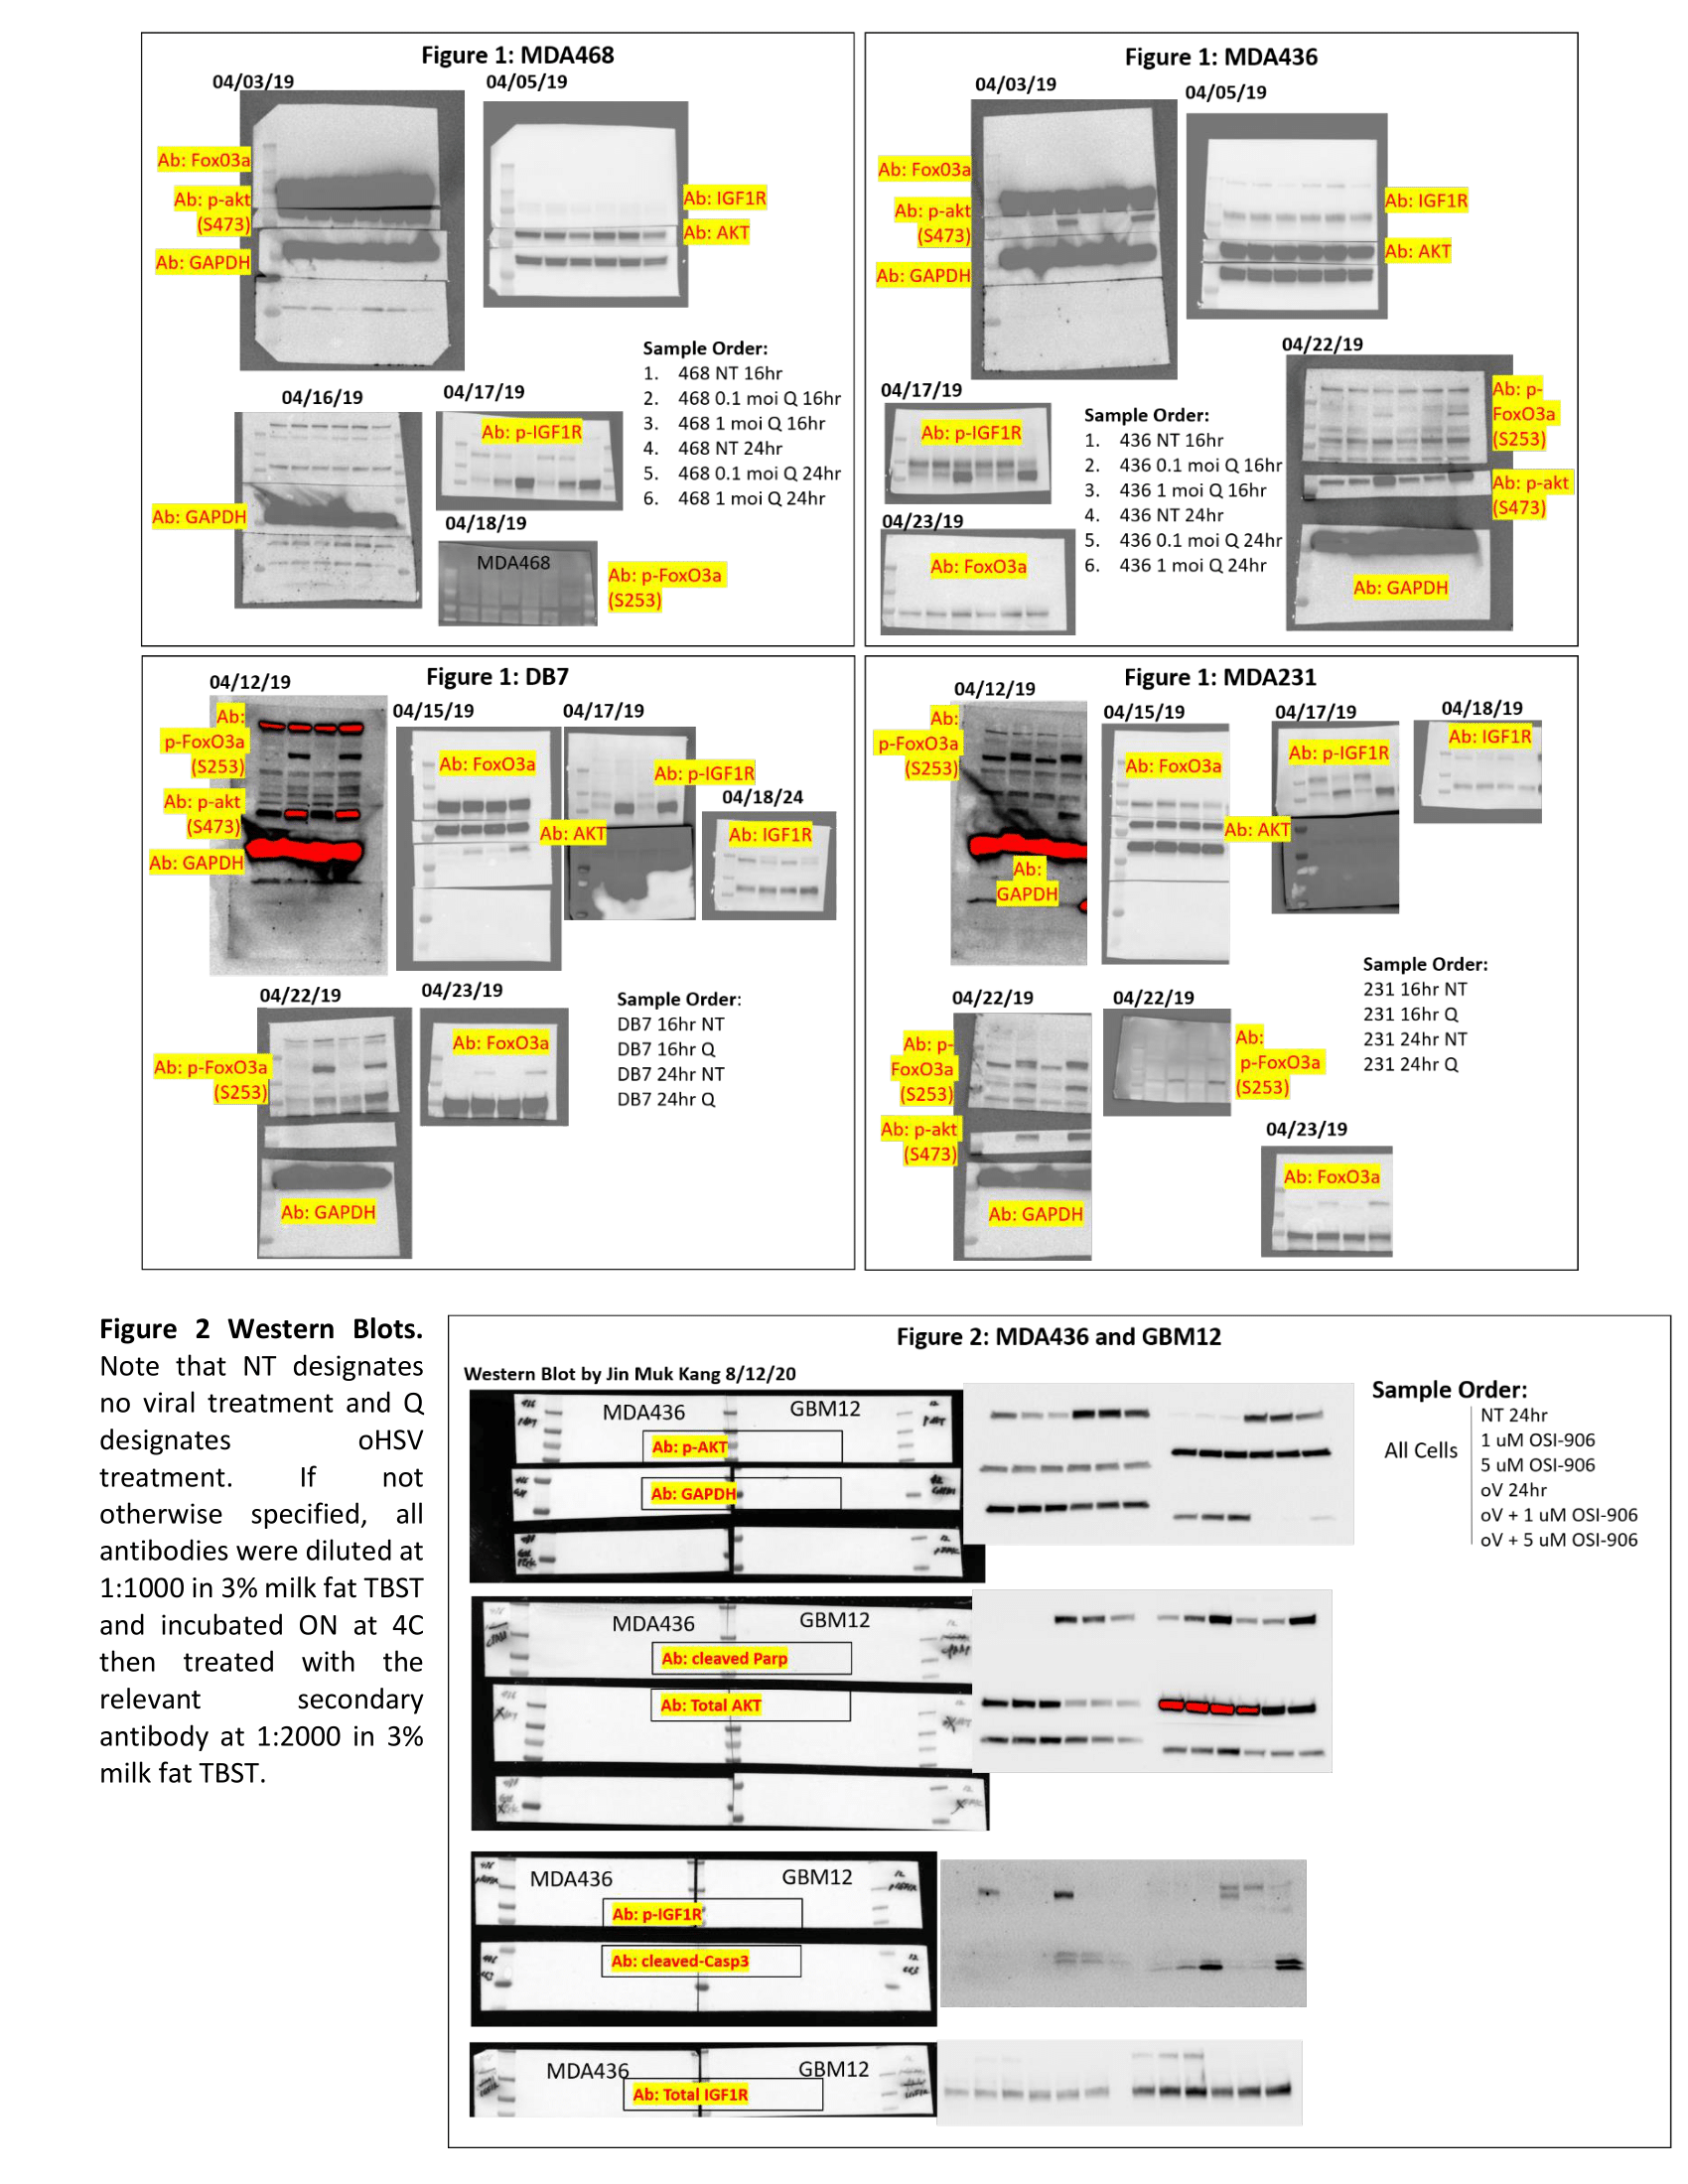


**Figure 2: DB7**

**Figure 2: MDA231**

**Figure 2: MDA436**

**Figure 2: MDA468**

**Figure 3: MDA436 and GBM12**


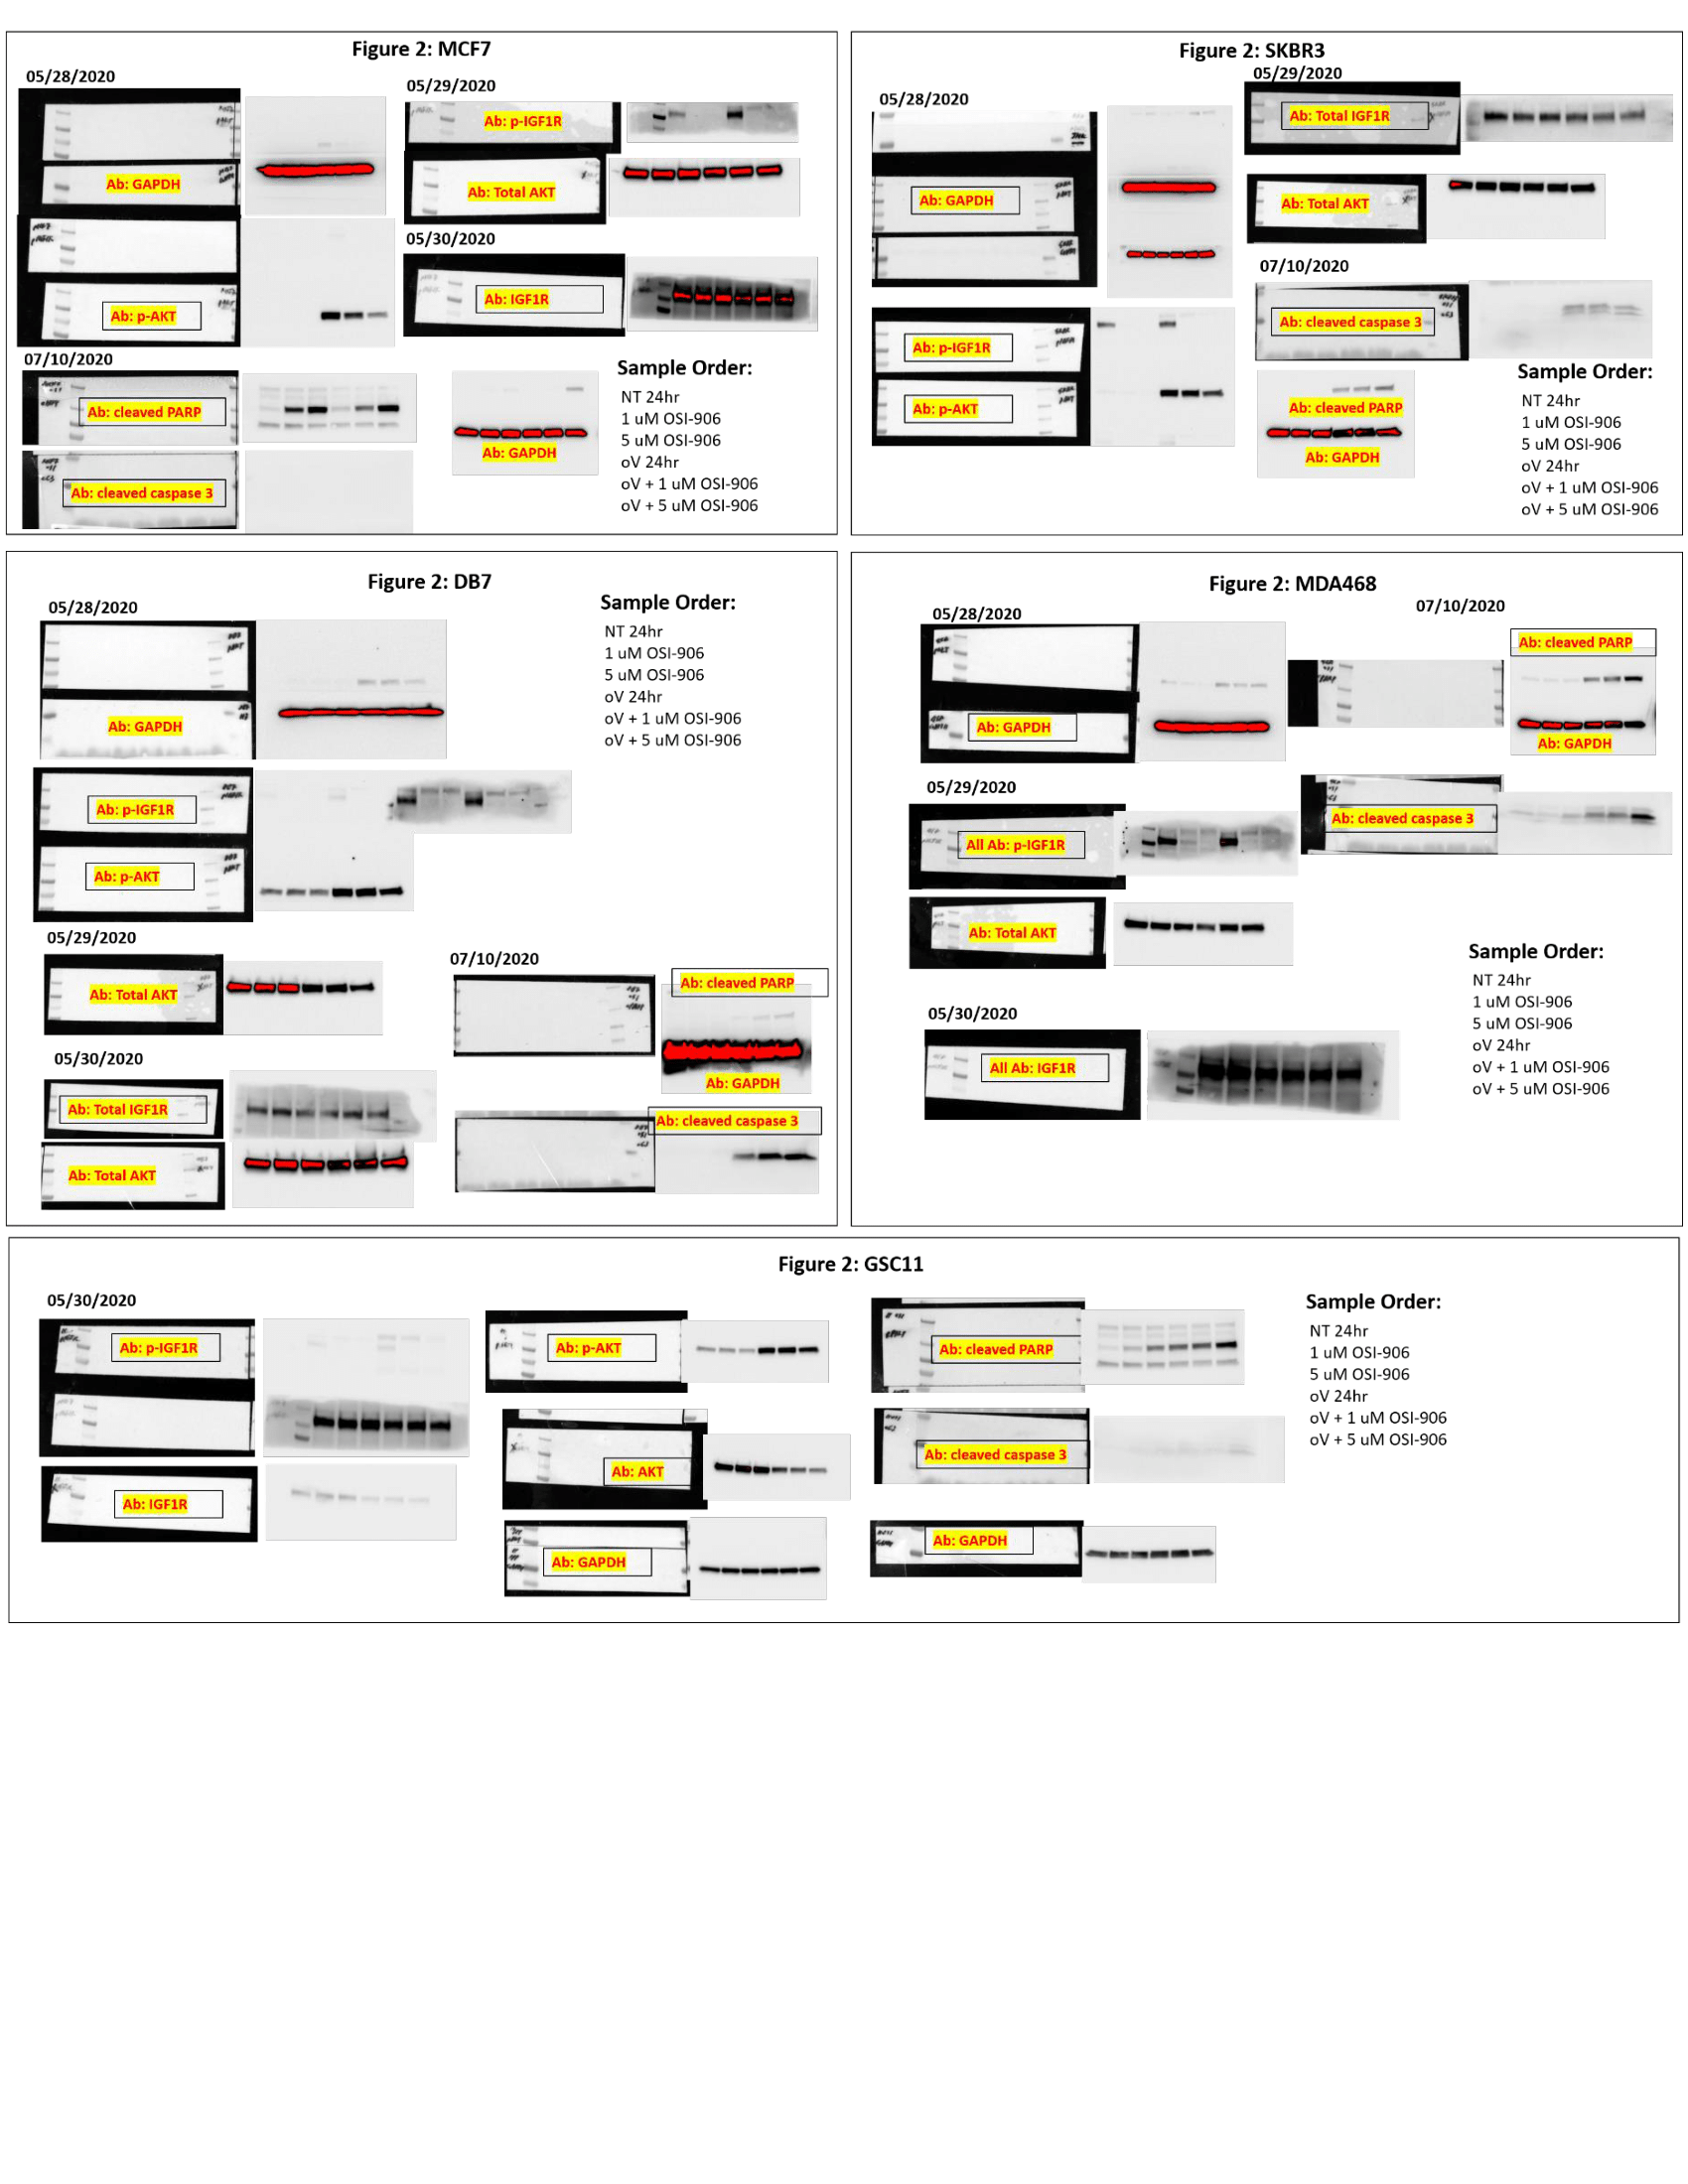


**Figure 3: SKBR3**

**Figure 3: MCF7**

**Figure 3: DB7**

**Figure 3: MDA468**

**Figure 3: GSC11**


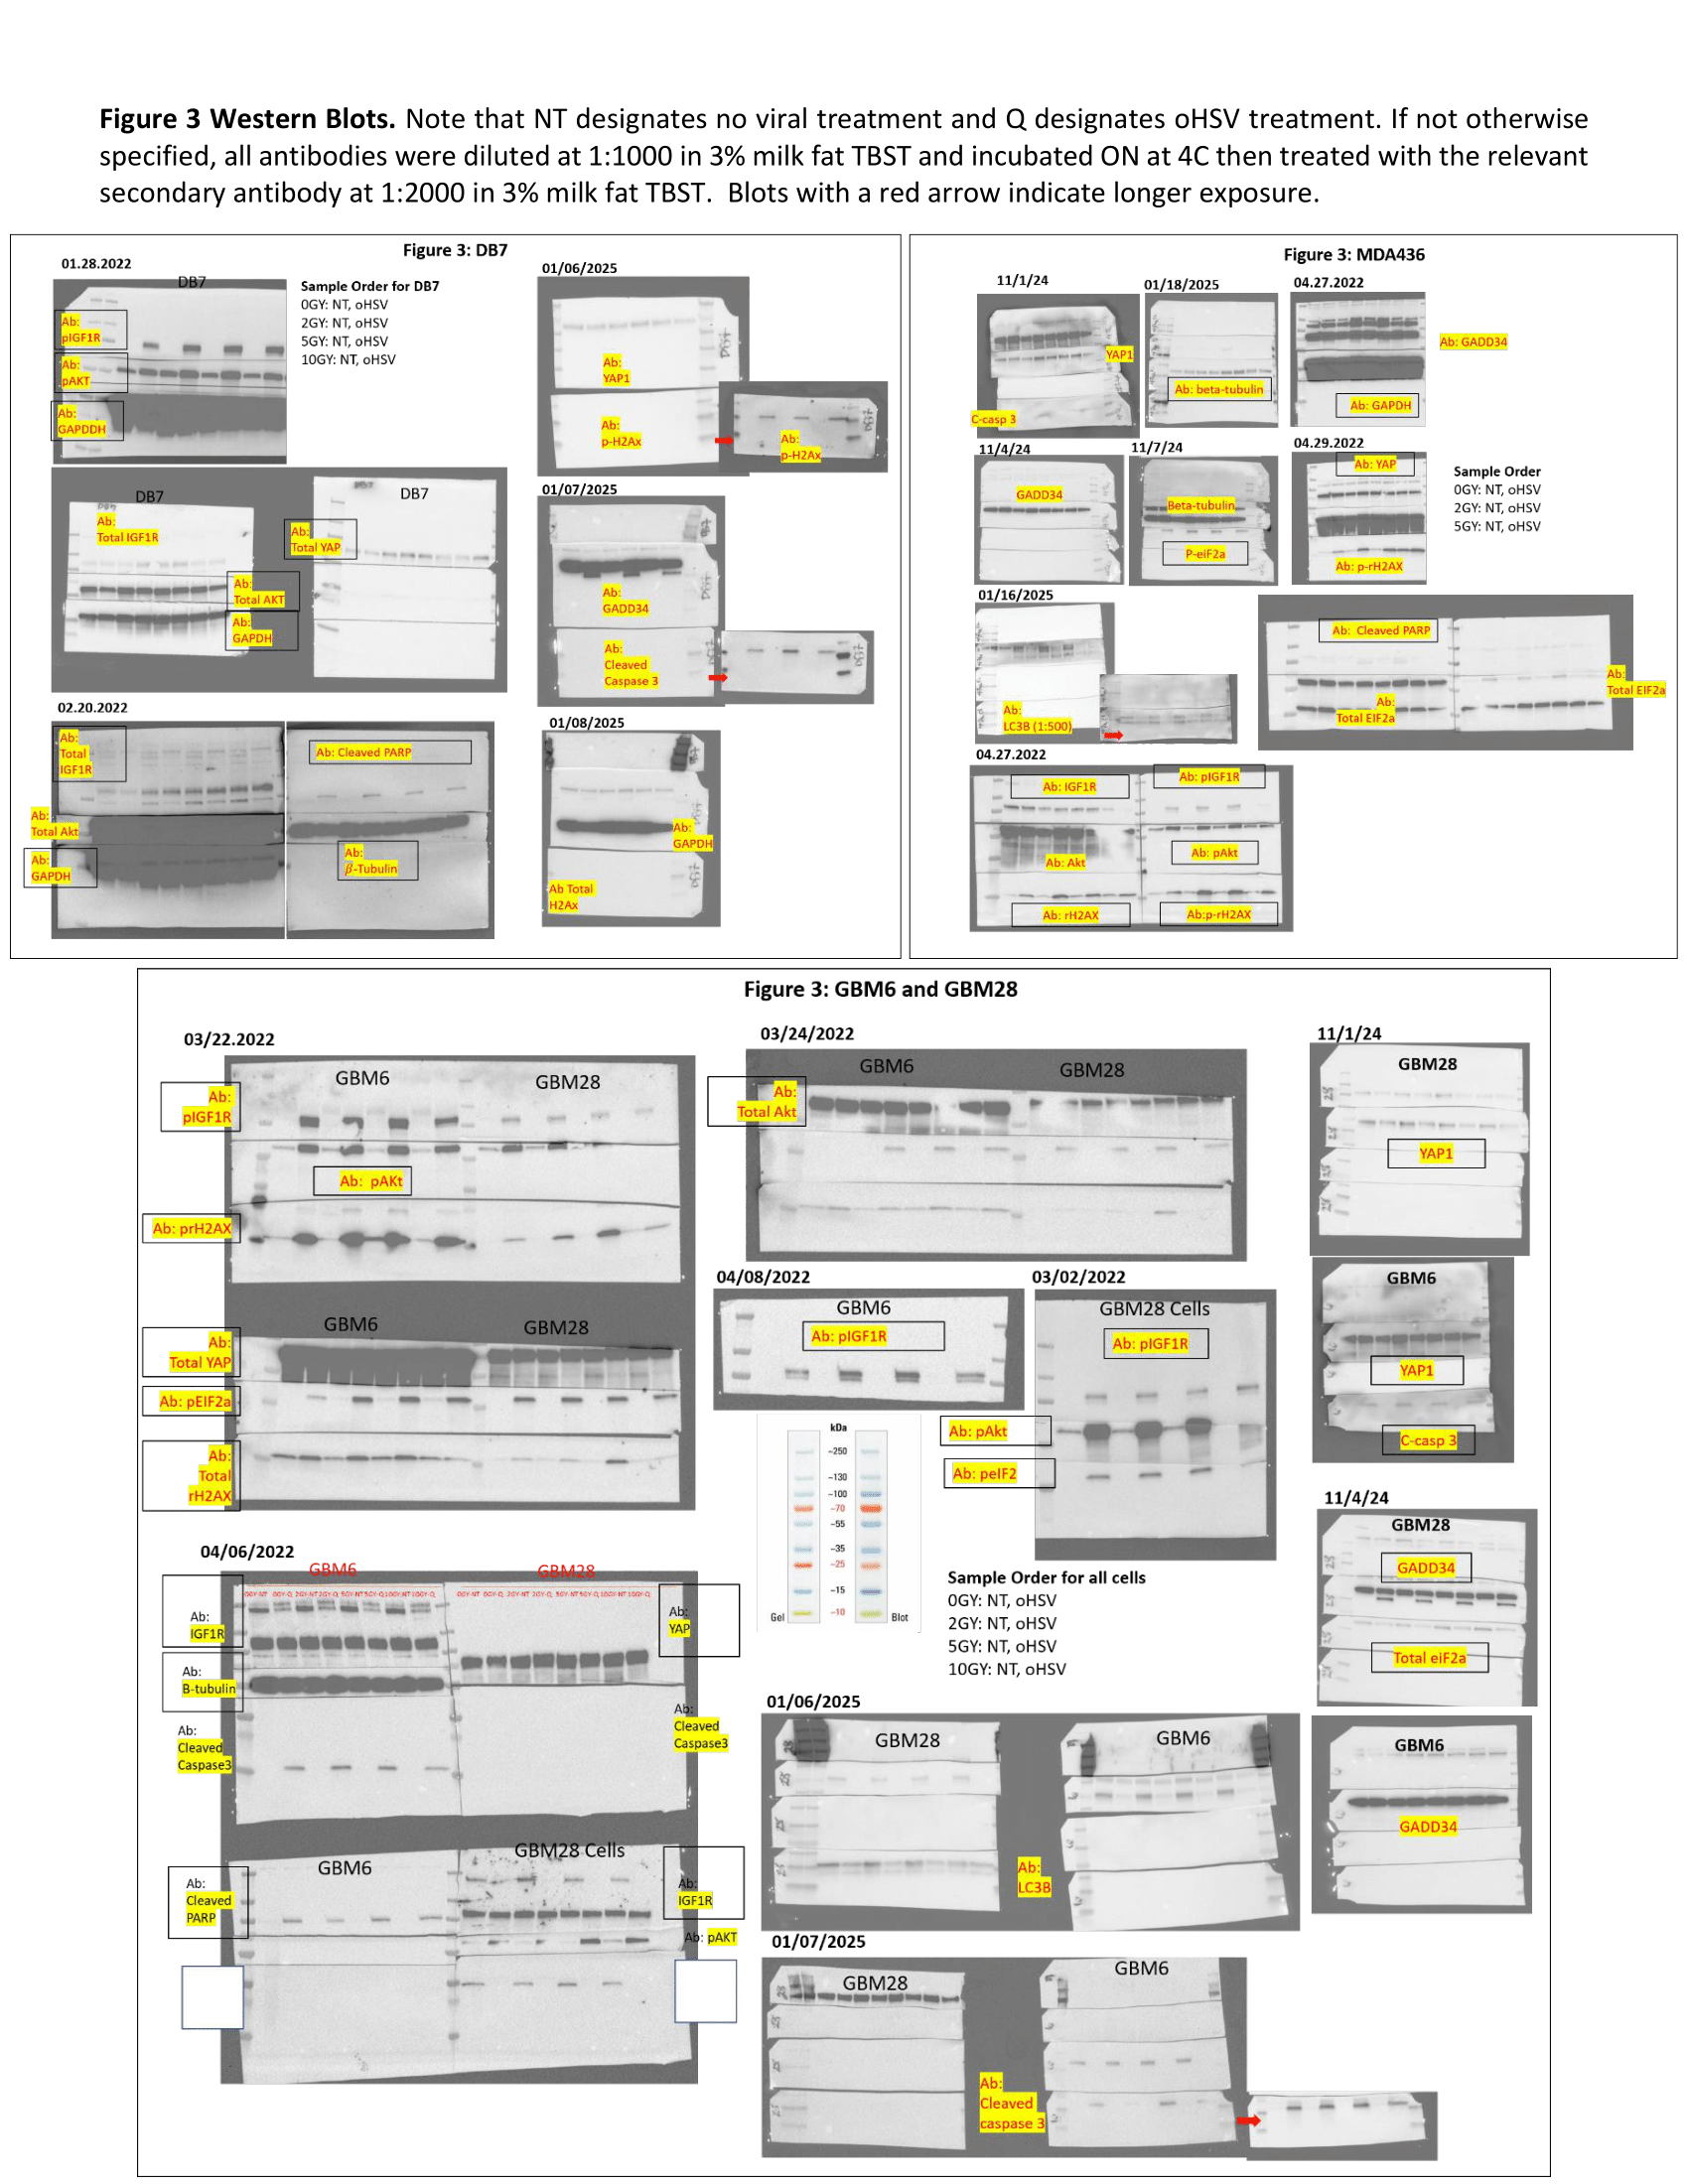


**Figure 4: MDA436**

**Figure 4: DB7**

**Figure 4:**


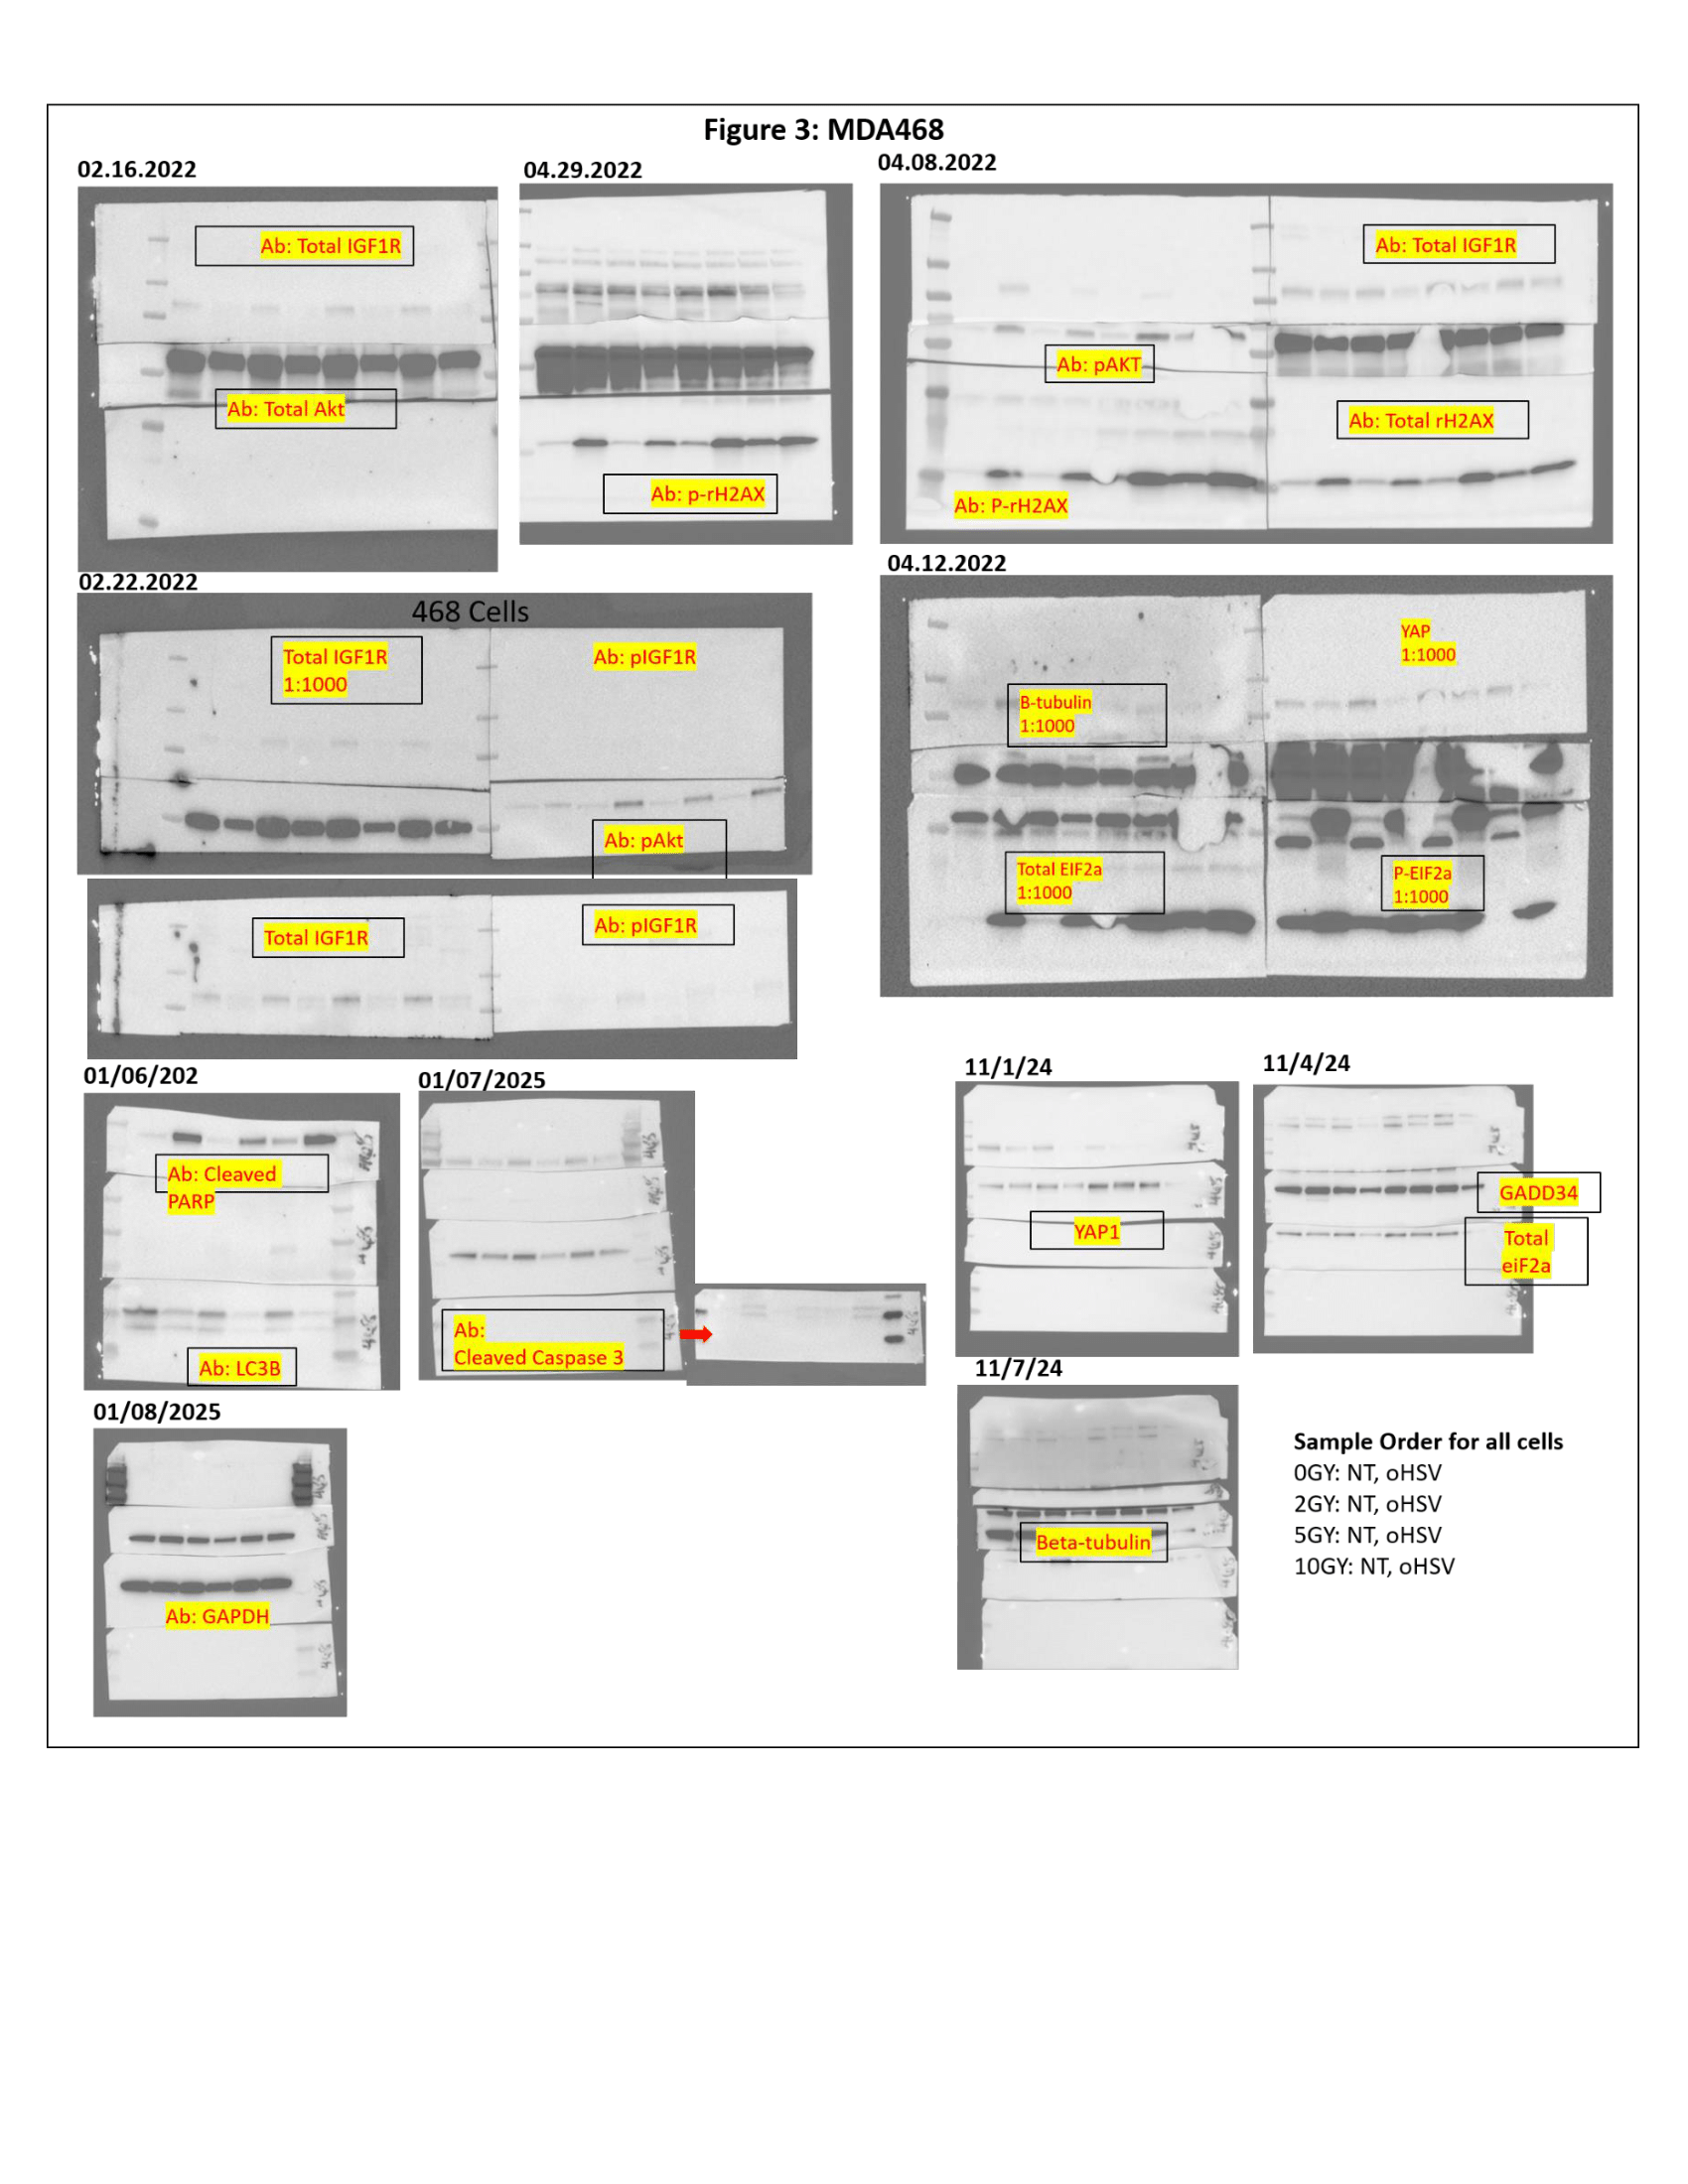


**Figure 4:**


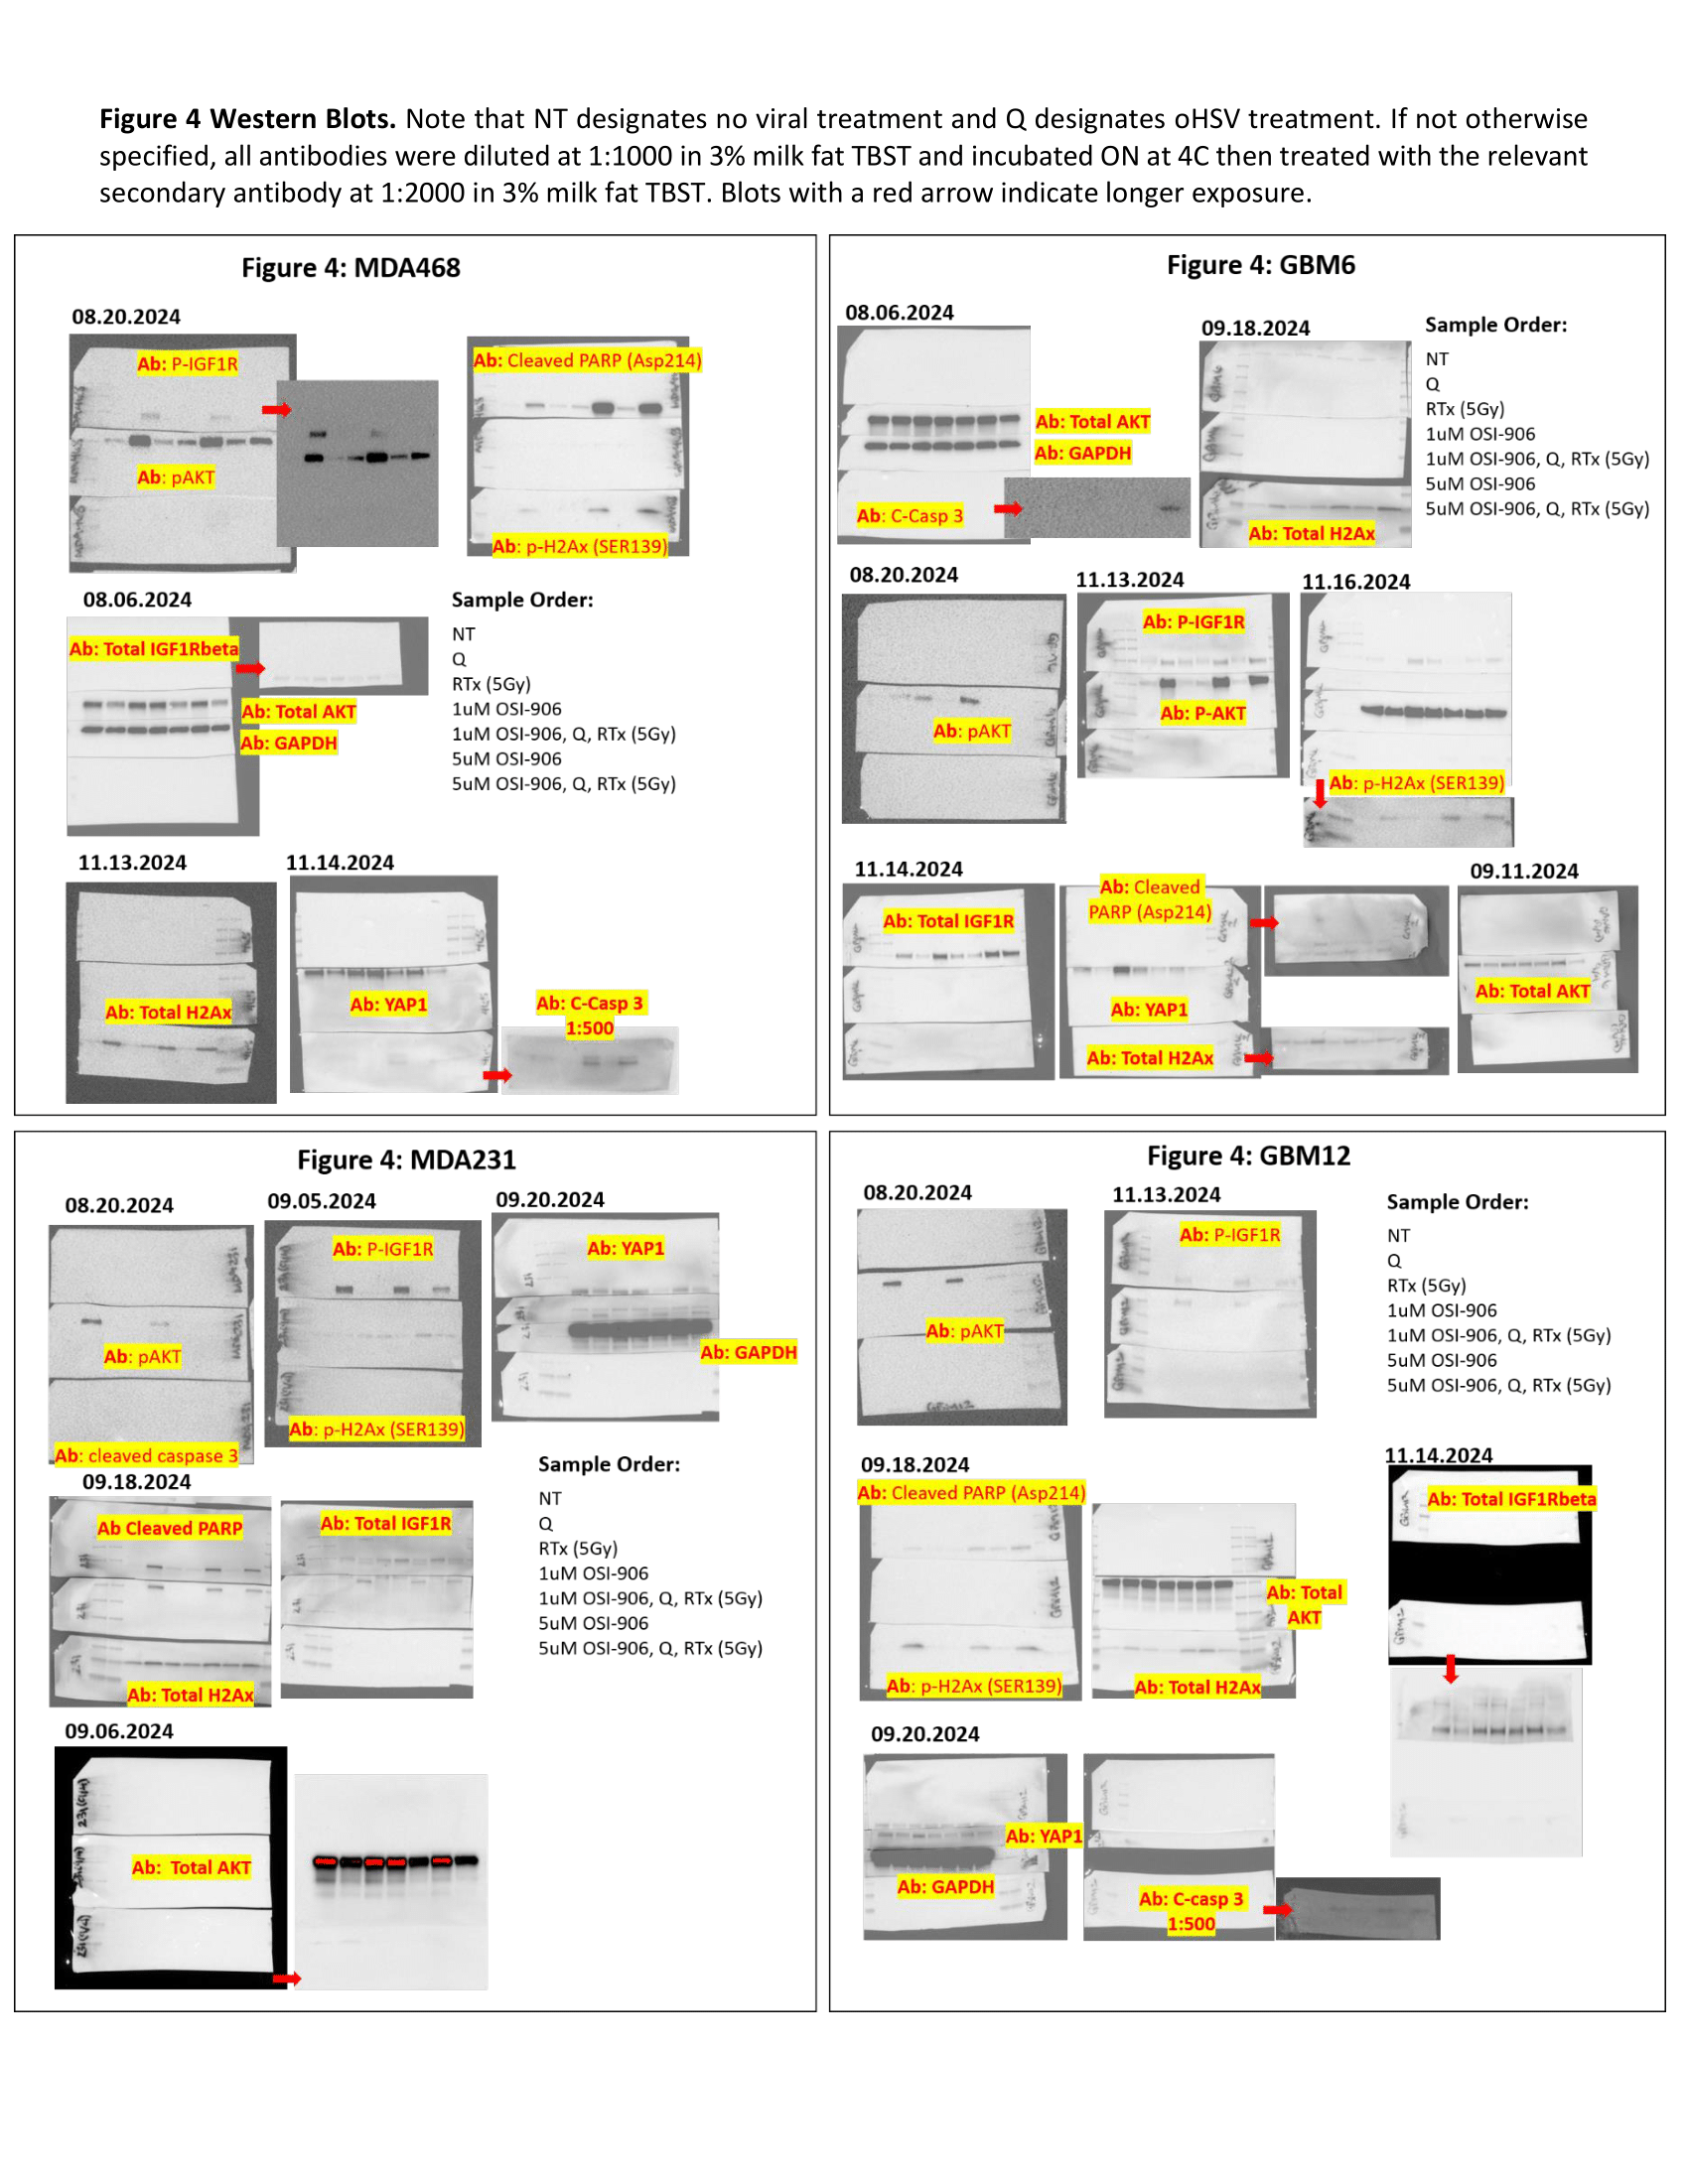


**Figure 5:**

**Figure 5:**

**Figure 5:**

**Figure 5:**
